# Supplementary material for: Chemo-, regio-, and stereoselectivity in 1,3-dipolar cycloaddition of piperine with nitrones. A cycloadditive route to aminoalcohols
Source: Royal Society of Chemistry journal article supplement (doi:10.1039/c9nj06442g), 2020-01-01
Supplement: c9nj06442g1.pdf [file c9nj06442g1.pdf]

# Chemo-, Regio-, and Stereoselectivity in 1,3-Dipolar Cycloaddition of Piperine with Nitrones. A Cycloadditive Route to Aminoalcohols

Hanna Wójtowicz-Rajchel<sup>a\*</sup>, Marcin Kaźmierczak<sup>a,b</sup>

<sup>a</sup>Faculty of Chemistry, Adam Mickiewicz University, Uniwersytetu Poznańskiego 8, 61-614 Poznań,  
Poland

<sup>b</sup>Centre for Advanced Technologies, Adam Mickiewicz University, Uniwersytetu Poznańskiego 10, 61-  
614 Poznań, Poland

\* E-mail address: [wojto@amu.edu.pl](mailto:wojto@amu.edu.pl); telephone number: +48 61 829 1667; fax number: +48 61 829  
155

## New Journal of Chemistry

### Supporting Information

Spectral characterization data for compounds:

**6a - 6c, 7, 8, 10a -10d, 11a, 11c, 12a and 13** ..... 2-8

<sup>1</sup>H NMR, <sup>19</sup>F NMR, <sup>13</sup>C NMR and 2D spectra of compounds:

**6a - 6c, 7, 8, 10a -10d, 11a, 11c, 12a and 13** ..... 9-35

**Compound 6a**5-((*E*)-2-(Benzo[d][1,3]dioxol-5-yl)vinyl)-2-methyl-3-

(trifluoromethyl)isoxazolidin-4-yl)(piperidin-1-yl)methanones

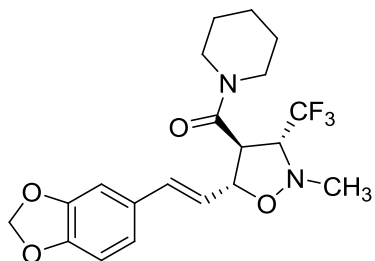

**6aA:**  $^1\text{H NMR}$  (600 MHz,  $\text{CDCl}_3$ ):  $\delta$  6.94 (d,  $J = 1.4$  Hz, 1H), 6.83 (dd,  $J = 8.0, 1.5$  Hz, 1H), 6.78 (d,  $J = 8.0$  Hz, 1H), 6.66 (d,  $J = 15.8$  Hz, 1H), 6.02 (m, 1H), 5.99 (s, 2H), 4.93 (t,  $J = 8.3$  Hz, 1H), 4.13(m, 1H), 3.72 (m, 2H), 3.56 (m, 1H), 3.45 (m, 2H), 3.02 (s, 3H), 1.57 (m, 6H);  $^{19}\text{F NMR}$  (565 MHz,  $\text{CDCl}_3$ ):  $\delta$  -74.67 (d,  $J = 7.9$  Hz);  $^{13}\text{C NMR}$  (151 MHz,  $\text{CDCl}_3$ ):  $\delta$  167.00 (s), 148.20 (s), 148.10 (s), 135.82 (s), 129.96 (s), 127.12 (q,  $J = 280.1.0$  Hz), 121.89 (s), 121.49 (s), 108.40 (s), 105.82 (s), 101.30 (s), 83.32 (s), 72.76 (q,  $J = 29.8$  Hz), 53.13 (s), 47.61 (s), 45.20 (s), 43.99 (s), 26.74 (s), 25.63 (s), 24.29 (s).

$^1\text{H NMR}$  (600 MHz,  $\text{CD}_3\text{CN}$ ):  $\delta$  7.04 (s, 1H), 6.88 (d,  $J = 8.0$  Hz, 1H), 6.80 (d,  $J = 8.0$  Hz, 1H), 6.68 (d,  $J = 15.8$  Hz, 1H), 6.11 (dd,  $J = 15.8, 8.5$  Hz, 1H), 5.96 (s, 2H), 4.84 (t,  $J = 8.5$  Hz, 1H), 4.19 (qd,  $J = 8.4, 4.9$  Hz, 1H), 3.79 (dd,  $J = 8.4, 4.9$  Hz, 1H), 3.68 (ddd,  $J = 12.9, 6.7, 3.8$  Hz, 1H), 3.41 (dddd,  $J = 21.7, 9.6, 6.7, 4.3$  Hz, 3H), 2.89 (s, 3H), 1.54 (q,  $J = 5.8$  Hz, 2H), 1.54 – 1.39 (m, 2H), 1.39 – 1.30 (m, 2H);  $^{19}\text{F NMR}$  (565 MHz,  $\text{CD}_3\text{CN}$ ):  $\delta$  -75.08 (d,  $J = 8.6$  Hz);  $^{13}\text{C NMR}$  (151 MHz,  $\text{CD}_3\text{CN}$ ):  $\delta$  167.74 (s), 149.30 (s), 149.12 (s), 136.60 (s), 131.45 (s), 126.75 (q,  $J = 278.3$  Hz), 123.29 (s), 123.09 (s), 109.23 (s), 106.72 (s), 102.68 (s), 84.30 (s), 73.32 (q,  $J = 29.5$  Hz), 53.75 (s), 48.20 (s), 45.82 (s), 44.50 (s), 27.65 (s), 26.56 (s), 25.08 (s).

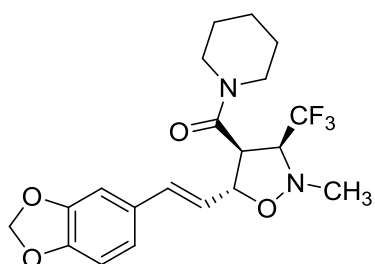

**6aB:**  $^1\text{H NMR}$  (600 MHz,  $\text{CDCl}_3$ ):  $\delta$  6.83 (s, 1H), 6.74 (d,  $J = 8.0$  Hz, 1H), 6.66 (d,  $J = 8.0$  Hz, 1H), 6.61 (d,  $J = 15.8$  Hz, 1H), 5.87 (s, 2H), 5.81 (dd,  $J = 15.8, 7.1$  Hz, 1H), 5.13 (t,  $J = 8.5$  Hz, 1H), 3.44 (m, 6H), 2.86 (s, 3H), 1.51 (m, 6H);  $^{19}\text{F NMR}$  (565 MHz,  $\text{CDCl}_3$ ):  $\delta$  -70.60 (d,  $J = 7.0$  Hz).

$^1\text{H NMR}$  (600 MHz,  $\text{CD}_3\text{CN}$ ):  $\delta$  7.00 (d,  $J = 1.7$  Hz, 1H), 6.86 (dd,  $J = 8.0, 1.7$  Hz, 1H), 6.79 (d,  $J = 8.0$  Hz, 1H), 6.58 (d,  $J = 15.8$  Hz, 1H), 6.00 (dd,  $J = 15.8, 7.9$  Hz, 1H), 5.95 (d,  $J = 2.8$  Hz, 2H), 5.02 (t,  $J = 8.8$  Hz, 1H), 3.97 (p,  $J = 8.5$  Hz, 1H), 3.73 (t,  $J = 9.3$  Hz, 1H), 3.53 (dd,  $J = 12.6, 5.8$  Hz, 2H), 3.41 (ddt,  $J = 16.1, 8.9, 3.5$  Hz, 2H),

2.84 (s, 3H), 1.66 – 1.39 (m, 6H);  $^{19}\text{F}$  NMR (565 MHz,  $\text{CD}_3\text{CN}$ ):  $\delta$  -71.39 (d,  $J$  = 8.2 Hz);  $^{13}\text{C}$  NMR (151 MHz,  $\text{CD}_3\text{CN}$ ):  $\delta$  164.81 (s), 149.27 (s), 148.84 (s), 134.94 (s), 131.74 (s), 125.76 (q,  $J$  = 280.2 Hz), 125.64 (s), 122.71 (s), 109.21 (s), 106.53 (s), 102.59 (s), 83.76 (s), 69.88 (q,  $J$  = 28.8 Hz), 50.56 (s), 47.91 (s), 47.23 (s), 43.53 (s), 27.02 (s), 26.22 (s), 25.14 (s).

**Compound 6bA**                    5-((*E*)-2-(Benzo[*d*][1,3]dioxol-5-yl)vinyl)-2-benzyl-3-(trifluoromethyl)isoxazolidin-4-yl)(piperidin-1-yl)methanone

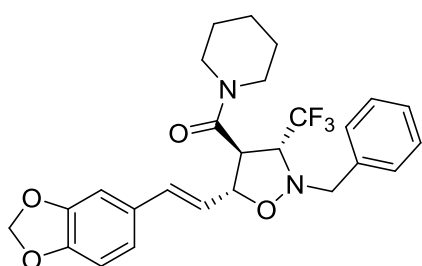

$^1\text{H}$  NMR (400 MHz,  $\text{CDCl}_3$ ):  $\delta$  7.50 (d,  $J$  = 7.0 Hz, 2H), 7.34 (dd,  $J$  = 7.2, 5.7 Hz, 2H), 7.28 (m, 2H), 6.91 (d,  $J$  = 1.5 Hz, 1H), 6.81 (dd,  $J$  = 8.0, 1.6 Hz, 1H), 6.76 (d,  $J$  = 8.0 Hz, 1H), 6.65 (d,  $J$  = 15.8 Hz, 1H), 5.99 (dd,  $J$  = 14.9, 7.4 Hz, 1H), 5.96 (s, 2H), 5.00 (t,  $J$  = 8.3 Hz, 1H), 4.39 (d,  $J$  = 12.3 Hz, 1H), 4.32 (d,  $J$  = 12.4 Hz, 1H), 4.25 (td,  $J$  = 8.1, 4.7 Hz, 1H), 3.64 (m, 4H), 3.43 (m, 1H), 1.49 (m, 6H);  $^{19}\text{F}$  NMR (376 MHz,  $\text{CDCl}_3$ ):  $\delta$  -74.59 (d,  $J$  = 8.1 Hz);  $^{13}\text{C}$  NMR (101 MHz,  $\text{CDCl}_3$ ):  $\delta$  167.51 (s), 148.19 (s), 148.10 (s), 135.86 (s), 135.84 (s), 129.95 (s), 129.67 (s), 128.43 (s), 127.72 (s), 125.10 (q,  $J$  = 279.4 Hz), 121.90 (s), 121.62 (s), 108.40 (s), 105.83 (s), 101.30 (s), 84.30 (s), 69.92 (q,  $J$  = 29.9 Hz), 60.82 (s), 53.09 (s), 47.74 (s), 44.03 (s), 26.80 (s), 25.71 (s), 24.28 (s).

$^1\text{H}$  NMR (600 MHz,  $\text{CD}_3\text{CN}$ ):  $\delta$  7.46 (d,  $J$  = 7.2 Hz, 2H), 7.37 (t,  $J$  = 7.5 Hz, 2H), 7.31 (t,  $J$  = 7.3 Hz, 1H), 7.05 (d,  $J$  = 1.7 Hz, 1H), 6.90 (dd,  $J$  = 8.0, 1.7 Hz, 1H), 6.81 (d,  $J$  = 8.0 Hz, 1H), 6.72 (d,  $J$  = 15.7 Hz, 1H), 6.12 (dd,  $J$  = 15.7, 8.5 Hz, 1H), 5.97 (s, 2H), 4.95 (t,  $J$  = 8.4 Hz, 1H), 4.42 – 4.35 (m, 1H), 4.35 (d,  $J$  = 12.8 Hz, 1H), 4.23 (d,  $J$  = 12.8 Hz, 1H), 3.86 (dd,  $J$  = 8.4, 4.5 Hz, 1H), 3.73 (ddd,  $J$  = 13.0, 6.7, 3.8 Hz, 1H), 3.50 – 3.36 (m, 3H), 1.61 – 1.24 (m, 6H);  $^{19}\text{F}$  NMR (565 MHz,  $\text{CD}_3\text{CN}$ ):  $\delta$  -74.92 (d,  $J$  = 8.4 Hz);  $^{13}\text{C}$  NMR (151 MHz,  $\text{CD}_3\text{CN}$ ):  $\delta$  168.07 (s), 149.29 (s), 149.14 (s), 137.93 (s), 136.83 (s), 131.41 (s), 130.63 (s), 129.35 (s), 128.63 (s), 126.62 (q,  $J$  = 278.4 Hz), 123.25 (s), 123.13 (s), 109.22 (s), 106.75 (s), 102.68 (s), 84.96 (s), 71.08 (q,  $J$  = 29.7 Hz), 61.36 (s), 53.66 (s), 48.28 (s), 44.55 (s), 27.68 (s), 26.56 (s), 25.07 (s).

**Compound 6cA**

5-((*E*)-2-(Benzo[d][1,3]dioxol-5-yl)vinyl)-tert-butyl-3-(trifluoromethyl) isoxazolidin-4-yl)(piperidin-1-yl)methanone

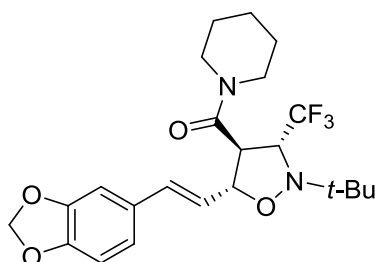

$^1\text{H}$  NMR (600 MHz,  $\text{CDCl}_3$ ):  $\delta$  6.90 (s, 1H), 6.80 (d,  $J$  = 8.0 Hz, 1H), 6.76 (d,  $J$  = 8.0 Hz, 1H), 6.59 (d,  $J$  = 15.8 Hz, 1H), 5.97 (s, 2H), 5.91 (dd,  $J$  = 15.8, 8.1 Hz, 1H), 4.81 (t,  $J$  = 8.8 Hz, 1H), 4.62 (p,  $J$  = 6.6 Hz, 1H), 3.82 – 3.73 (m, 1H), 3.68 – 3.52 (m, 2H), 3.45 – 3.30 (m, 2H), 1.47 (ddd,  $J$  = 89.2, 47.0, 19.0 Hz, 6H), 1.27 (s, 9H);  $^{19}\text{F}$  NMR (565 MHz,  $\text{CDCl}_3$ ):  $\delta$  -73.88 (d,  $J$  = 6.8 Hz);  $^{13}\text{C}$  NMR (151 MHz,  $\text{CDCl}_3$ ):  $\delta$  166.44 (s), 148.19 (s), 148.03 (s), 135.38 (s), 130.06 (s), 125.65 (q,  $J$  = 279.4 Hz), 122.17 (s), 121.81 (s), 108.40 (s), 105.71 (s), 101.28 (s), 86.23 (s), 65.59 (q,  $J$  = 29.8 Hz), 61.49 (s), 53.93 (s), 47.49 (s), 43.89 (s), 27.09 (s), 26.64 (s), 25.70 (s), 24.31 (s).

**Compound 7**

(*E*)-(5-(2-(Benzo[d][1,3]dioxol-5-yl)vinyl)-2-methyl isoxazolidin-4-yl)(piperidin-1-yl)methanone

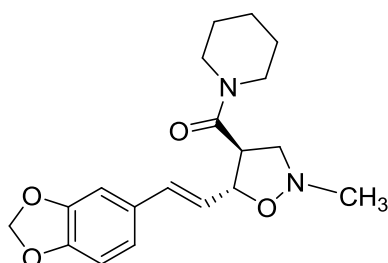

$^1\text{H}$  NMR (600 MHz,  $\text{CDCl}_3$ ):  $\delta$  6.92 (s, 1H), 6.81 (d,  $J$  = 8.0 Hz, 1H), 6.74 (d,  $J$  = 8.0 Hz, 1H), 6.58 (d,  $J$  = 15.8 Hz, 1H), 6.08 (s,  $J$  = 12.1 Hz, 2H), 5.94 (m, 1H), 4.92 (m, 1H), 3.54 (m, 7H), 2.75 (s, 3H), 1.52 (m, 6H);  $^{13}\text{C}$  NMR (151 MHz,  $\text{CDCl}_3$ ):  $\delta$  168.82 (s), 148.04 (s), 147.61 (s), 133.21 (s), 130.66 (s), 125.28 (s), 121.31 (s), 108.55 (s), 105.82 (s), 101.03 (s), 81.41 (s), 61.03 (s), 52.23 (s), 46.88 (s), 45.82 (s), 43.37 (s), 27.04 (s), 25.59 (s), 24.45 (s).

**Compound 8**

(*E*)-(4-(2-(benzo[d][1,3]dioxol-5-yl)vinyl)-2-methyl isoxazolidin-5-yl)(piperidin-1-yl)methanone

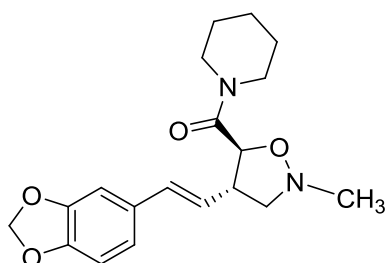

$^1\text{H}$  NMR (600 MHz,  $\text{CDCl}_3$ ):  $\delta$  6.90 (d,  $J$  = 1.4 Hz, 1H), 6.78 (dd,  $J$  = 8.0, 1.4 Hz, 1H), 6.74 (d,  $J$  = 8.0 Hz, 1H),

6.48 (d,  $J = 15.7$  Hz, 1H), 6.06 (m, 1H), 5.94 (s, 2H), 4.45 (m, 1H), 4.08 (s, 1H), 3.43 (m, 6H), 2.75 (s, 3H), 1.60 (m, 6H);  $^{13}\text{C}$  NMR (151 MHz,  $\text{CDCl}_3$ ):  $\delta$  148.01 (s), 147.18 (s), 131.96 (s), 131.27 (s), 126.65 (s), 120.93 (s), 108.28 (s), 105.48 (s), 101.06 (s), 81.31 (s), 63.72 (s), 47.82 (s), 46.88 (s), 46.01 (s), 43.45 (s), 29.59 (s), 26.57 (s), 25.48 (s), 24.46 (s).

**Compound 10a** (*E*)-5-(benzo[d][1,3]dioxol-5-yl)-3-hydroxy-1-(piperidin-1-yl)-2-(2,2,2-trifluoro-1-(methylamino)ethyl)pent-4-en-1-one

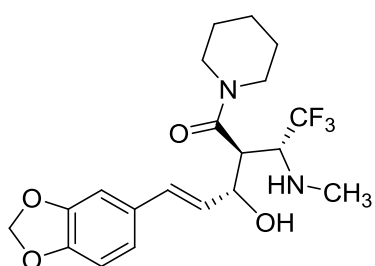

$^1\text{H}$  NMR (400 MHz,  $\text{CDCl}_3$ ):  $\delta$  6.89 (d,  $J = 1.5$  Hz, 1H), 6.81 (dd,  $J = 8.0, 1.6$  Hz, 1H), 6.75 (d,  $J = 8.0$  Hz, 1H), 6.59 (d,  $J = 15.8$  Hz, 1H), 5.96 (s, 2H), 5.95 (m, 3H), 4.70 (t,  $J = 7.0$  Hz, 1H), 3.99 (m, 1H), 3.49 (m, 5H), 3.04 (dd,  $J = 10.4, 8.3$  Hz, 1H), 2.72 (s, 3H), 1.42 (m, 6H);  $^{19}\text{F}$  NMR (376 MHz,  $\text{CDCl}_3$ ):  $\delta$  -73.03 (d,  $J = 7.0$  Hz);  $^{13}\text{C}$  NMR (101 MHz,  $\text{CDCl}_3$ ):  $\delta$  168.13 (s), 147.94 (s), 147.23 (s), 131.16 (s), 131.04 (s), 126.32 (s), 126.22 (q,  $J = 287.8$  Hz), 121.33 (s), 108.28 (s), 105.55 (s), 101.04 (s), 74.70 (s), 64.32 (q,  $J = 26.7$  Hz), 47.02 (s), 46.60 (s), 42.81 (s), 36.15 (s), 25.96 (s), 25.33 (s), 24.35 (s).

**Compound 10c** (*E*)-5-(benzo[d][1,3]dioxol-5-yl)-3-hydroxy-1-(piperidin-1-yl)-2-(2,2,2-trifluoro-1-(tert-butylamino)ethyl)pent-4-en-1-one

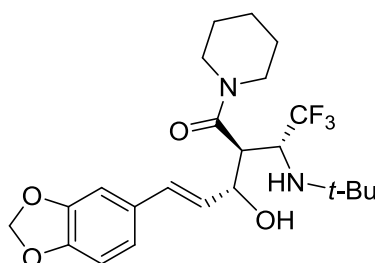

$^1\text{H}$  NMR (400 MHz,  $\text{CDCl}_3$ ):  $\delta$  6.88 (d,  $J = 1.4$  Hz, 1H), 6.80 (dd,  $J = 8.0, 1.5$  Hz, 1H), 6.75 (d,  $J = 8.0$  Hz, 1H), 6.59 (d,  $J = 15.9$  Hz, 1H), 5.96 (s, 1H), 5.92 (dd,  $J = 15.9, 6.3$  Hz, 1H), 4.62 (dd,  $J = 14.6, 7.8$  Hz, 1H), 4.40 (m, 1H), 3.48 (m, 5H), 3.07 (t,  $J = 9.3$  Hz, 1H), 1.36 (m, 6H), 1.28 (s, 9H);  $^{19}\text{F}$  NMR (376 MHz,  $\text{CDCl}_3$ ):  $\delta$  -73.25 (dd,  $J = 6.1$  Hz);  $^{13}\text{C}$  NMR (101 MHz,  $\text{CDCl}_3$ ):  $\delta$  168.97 (s), 147.97 (s), 147.21 (s), 131.19 (s), 130.79 (s), 126.35 (s), 126.05 (q,  $J = 285.0$  Hz), 121.22 (s), 108.11 (s), 105.52 (s), 100.97 (s), 73.55 (s), 57.36 (q,  $J = 27.0$  Hz), 52.62 (s), 47.50 (s), 47.01 (s), 42.76 (s), 29.63 (s), 25.80 (s), 25.31 (s), 24.31 (s).

**Compound 10d** (E)-5-(benzo[d][1,3]dioxol-5-yl)-3-hydroxy-2-((methylamino)methyl)-1-(piperidin-1-yl)pent-4-en-1-one

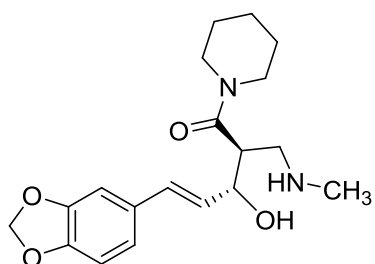

$^1\text{H}$  NMR (600 MHz,  $\text{CDCl}_3$ ):  $\delta$  6.90 (d,  $J = 1.1$  Hz, 1H), 6.80 (dd,  $J = 8.0, 1.2$  Hz, 1H), 6.74 (d,  $J = 8.0$  Hz, 1H), 6.58 (d,  $J = 15.8$  Hz, 1H), 6.03 (dd,  $J = 15.8, 5.8$  Hz, 1H), 5.94 (s, 2H), 4.68 (t,  $J = 5.6$  Hz, 1H), 4.13 (bs, 1H), 3.60 (s, 1H), 3.47 (s, 3H), 3.14 (s, 1H), 2.97 (s, 2H), 2.43 (s, 3H), 1.65 (s, 6H);  $^{13}\text{C}$  NMR (101 MHz,  $\text{CDCl}_3$ ):  $\delta$  171.08 (s), 147.94 (s), 147.18 (s), 131.30 (s), 129.93 (s), 128.37 (s), 121.14 (s), 108.19 (s), 105.62 (s), 101.01 (s), 74.95 (s), 52.54 (s), 47.23 (s), 45.62 (s), 42.86 (s), 36.28 (s), 26.60 (s), 25.65 (s), 24.45 (s).

**Compound 11a** 5-(2-(benzo[d][1,3]dioxol-5-yl)ethyl)-2-methyl-3-(trifluoromethyl)-isoxazolidin-4-yl(piperidin-1-yl)methanone

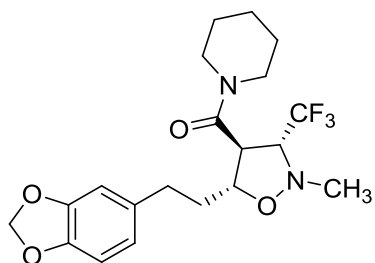

$^1\text{H}$  NMR (600 MHz,  $\text{CDCl}_3$ ):  $\delta$  6.93 (d,  $J = 1.2$  Hz, 1H), 6.80 (dd,  $J = 8.0, 1.2$  Hz, 1H), 6.76 (d,  $J = 7.9$  Hz, 1H), 5.96 (d,  $J = 2.0$  Hz, 2H), 4.18 (m, 1H), 3.96 (dd,  $J = 11.2, 3.2$  Hz, 1H), 3.84 (d,  $J = 8.1$  Hz, 1H), 3.78 (dq,  $J = 13.7, 4.6$  Hz, 1H), 3.53 (m, 4H), 3.39 (t,  $J = 4.4$  Hz, 1H), 2.55 (m, 1H), 2.28 (s, 3H), 2.06 (m, 1H), 1.67 (dd,  $J = 42.9, 5.5$  Hz, 6H);  $^{19}\text{F}$  NMR (565 MHz,  $\text{CDCl}_3$ ):  $\delta$  -67.30 (s);  $^{13}\text{C}$  NMR (101 MHz,  $\text{CDCl}_3$ ):  $\delta$  170.36 (s), 147.88 (s), 146.79 (s), 136.10 (s), 127.31 (q,  $J = 292.0$  Hz), 120.97 (s), 108.33 (s), 107.82 (s), 100.97 (s), 65.83 (s), 63.45 (q,  $J = 25.4$  Hz), 58.47 (s), 47.07 (s), 43.44 (s), 39.70 (s), 39.15 (s), 35.79 (s), 26.50 (s), 25.58 (s), 24.45 (s).

**Compound 11c** 5-(2-(benzo[d][1,3]dioxol-5-yl)ethyl)-2-tert-butyl-3-(trifluoromethyl)isoxazolidin-4-yl(piperidin-1-yl)methanone

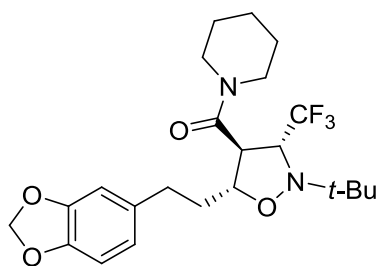

$^1\text{H}$  NMR (400 MHz,  $\text{CDCl}_3$ ):  $\delta$  6.76 (d,  $J = 8.1$  Hz, 1H), 6.66 (d,  $J = 2.1$  Hz, 1H), 6.63 (dd,  $J = 8.1, 2.1$  Hz, 1H), 5.95 (s, 2H), 4.42 (m, 1H), 4.31 (dt,  $J = 9.8, 6.1$  Hz, 1H), 3.82 (m, 1H), 3.61 (m, 2H), 3.44 (m, 2H), 2.77 (m, 1H), 2.57 (m, 1H), 1.84 (dt,  $J = 13.6, 7.6$  Hz, 2H), 1.65 (m, 6H), 1.25 (s, 9H);  $^{19}\text{F}$  NMR (376 MHz,  $\text{CDCl}_3$ ):  $\delta$  -73.77 (d,  $J = 6.8$  Hz);  $^{13}\text{C}$  NMR (101 MHz,  $\text{CDCl}_3$ ):  $\delta$  167.17 (s), 147.66 (s), 145.87 (s), 134.86 (s), 125.60 (q,  $J = 279.2$  Hz), 121.18 (s), 108.74 (s), 108.26 (s), 100.82 (s), 83.70 (s), 65.71 (q,  $J = 29.6$  Hz), 61.40 (s), 52.61 (s), 47.49 (s), 43.87 (s), 35.13 (s), 32.28 (s), 27.13 (s), 26.74 (s), 25.63 (s), 24.41 (s).

**Compound 12a**                    5-(benzo[d][1,3]dioxol-5-yl)-3-hydroxy-1-(piperidin-1-yl)-2-(2,2,2-trifluoro-1-(methylamino)ethyl)pentan-1-one

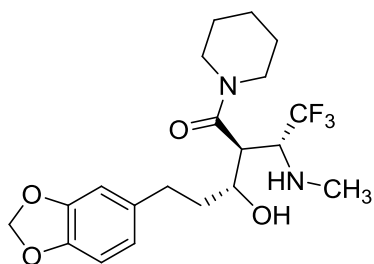

$^1\text{H}$  NMR (600 MHz,  $\text{CDCl}_3$ ):  $\delta$  6.74 (d,  $J = 8.1$  Hz, 1H), 6.67 (d,  $J = 1.5$  Hz, 1H), 6.63 (dd,  $J = 8.1, 1.5$  Hz, 1H), 5.94 (s, 2H), 4.45 (td,  $J = 8.4, 3.6$  Hz, 1H), 3.91 (dd,  $J = 13.7, 7.1$  Hz, 1H), 3.76 (m, 1H), 3.53 (m, 4H), 3.43 (m, 1H), 2.99 (s, 3H), 2.74 (m, 1H), 2.58 (m, 1H), 2.13 (s, 1H), 1.96 (m, 1H), 1.89 (m, 1H), 1.65 (m, 6H);  $^{19}\text{F}$  NMR (565 MHz,  $\text{CDCl}_3$ ):  $\delta$  -74.49 (s);  $^{13}\text{C}$  NMR (101 MHz,  $\text{CDCl}_3$ ):  $\delta$  167.63 (s), 147.66 (s), 145.87 (s), 134.79 (s), 125.17 (q,  $J = 278.6$  Hz), 121.15 (s), 108.79 (s), 108.27 (s), 100.83 (s), 80.89 (s), 72.88 (q,  $J = 29.4$  Hz), 51.72 (s), 47.52 (s), 45.69 (s), 43.96 (s), 34.18 (s), 32.01 (s), 26.78 (s), 25.59 (s), 24.38 (s).

**Compound 13**                    (*E*)-4-(2-(benzo[d][1,3]dioxol-5-yl)vinyl)-3-hydroxy-1-methylpyrrolidin-2-one

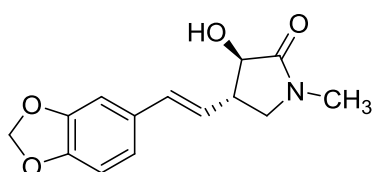

$^1\text{H}$  NMR (600 MHz,  $\text{CDCl}_3$ ):  $\delta$  6.95 (d,  $J = 1.6$  Hz, 1H), 6.81 (dd,  $J = 8.0, 1.6$  Hz, 1H), 6.75 (d,  $J = 8.0$  Hz, 1H), 6.45 (d,  $J = 15.8$  Hz, 1H), 6.13 (dt,  $J = 21.6, 10.8$  Hz,

1H), 5.95 (s, 2H), 4.38 (d,  $J = 7.2$  Hz, 1H), 3.54 (dd,  $J = 10.0, 6.7$  Hz, 1H), 3.31 (dd,  $J = 10.0, 4.2$  Hz, 1H), 3.26 – 3.20 (m, 1H), 2.92 (s, 3H);  $^{13}\text{C}$  NMR (151 MHz,  $\text{CDCl}_3$ ):  $\delta$  174.35 (s), 148.00 (s), 147.20 (s), 132.74 (s), 131.31 (s), 123.63 (s), 120.99 (s), 108.21 (s), 105.70 (s), 101.05 (s), 71.88 (s), 52.49 (s), 41.73 (s), 30.05 (s).



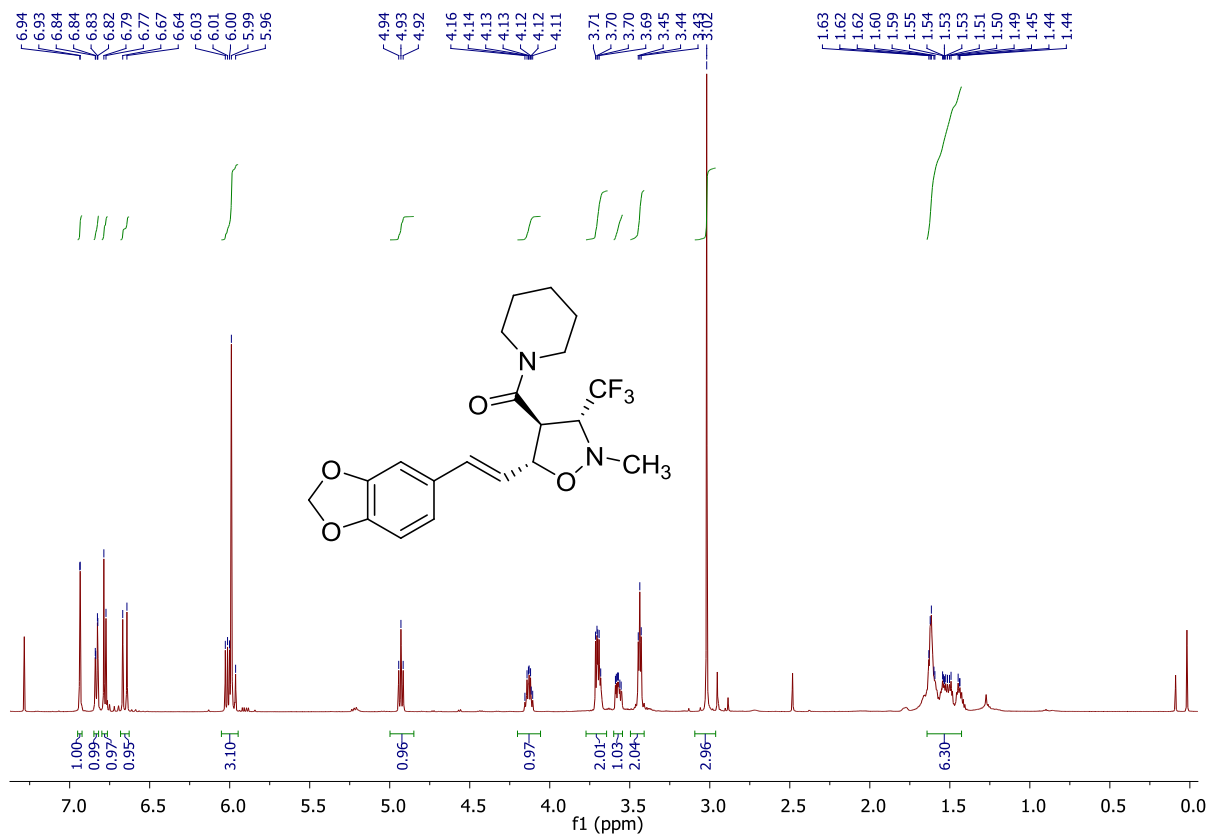

**Compound 6aA, <sup>1</sup>H NMR (CDCl<sub>3</sub>)**

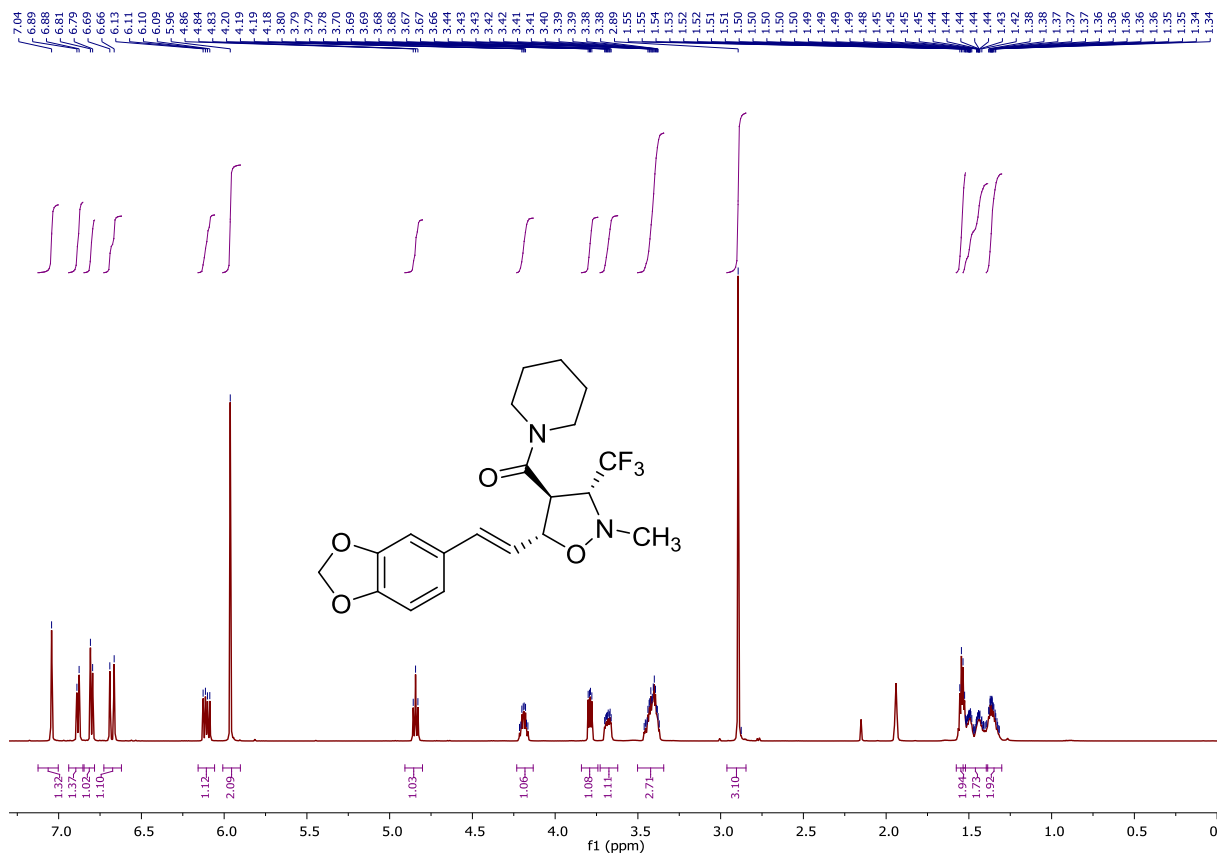

**Compound 6aA, <sup>1</sup>H NMR (CD<sub>3</sub>CN)**

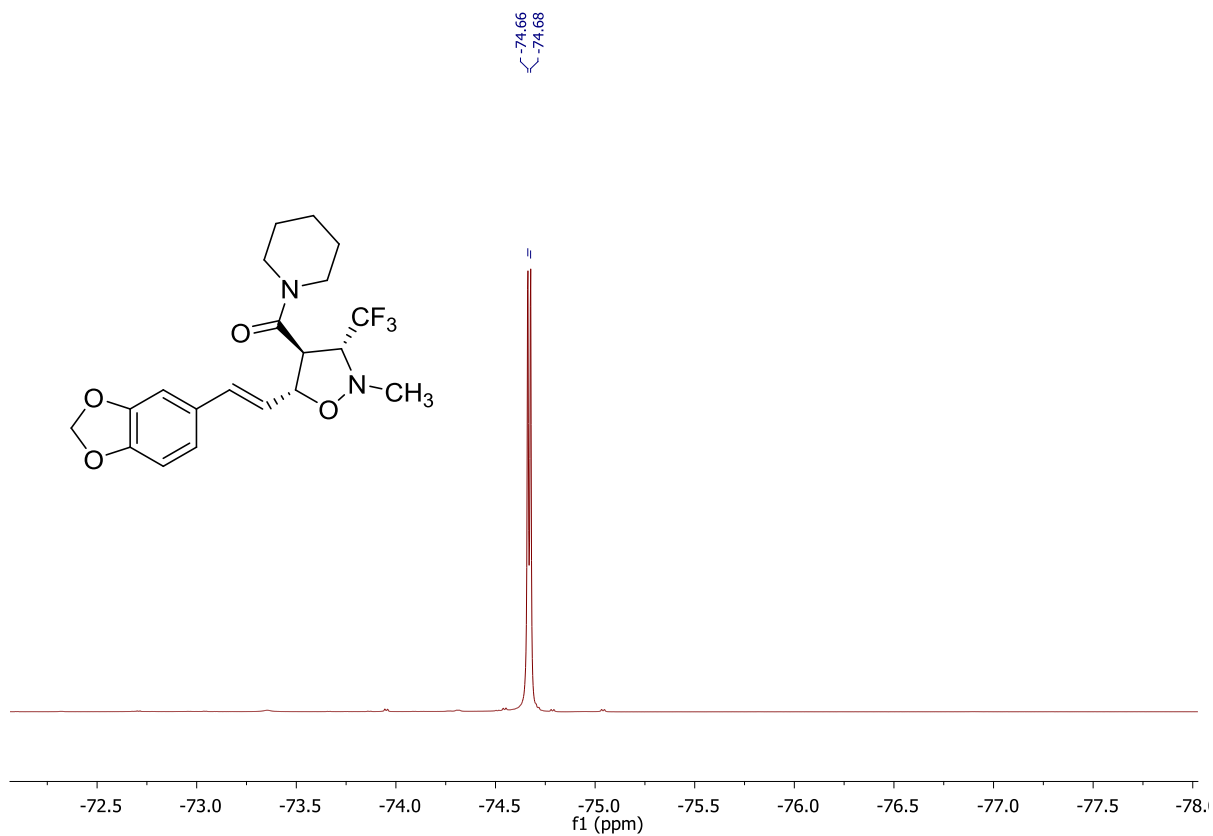

Compound 6aA,  $^{19}\text{F}$  NMR (CDCl<sub>3</sub>)

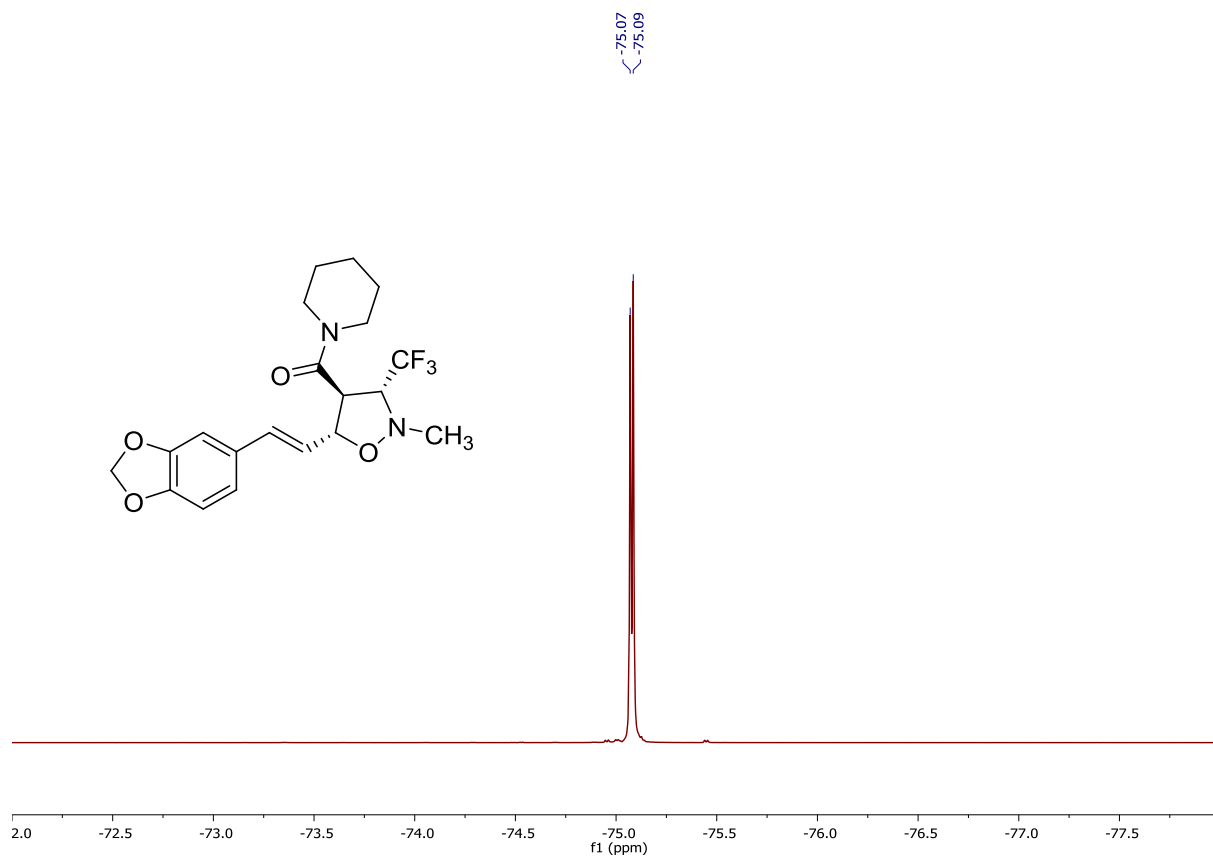

Compound 6aA,  $^{19}\text{F}$  NMR (CD<sub>3</sub>CN)

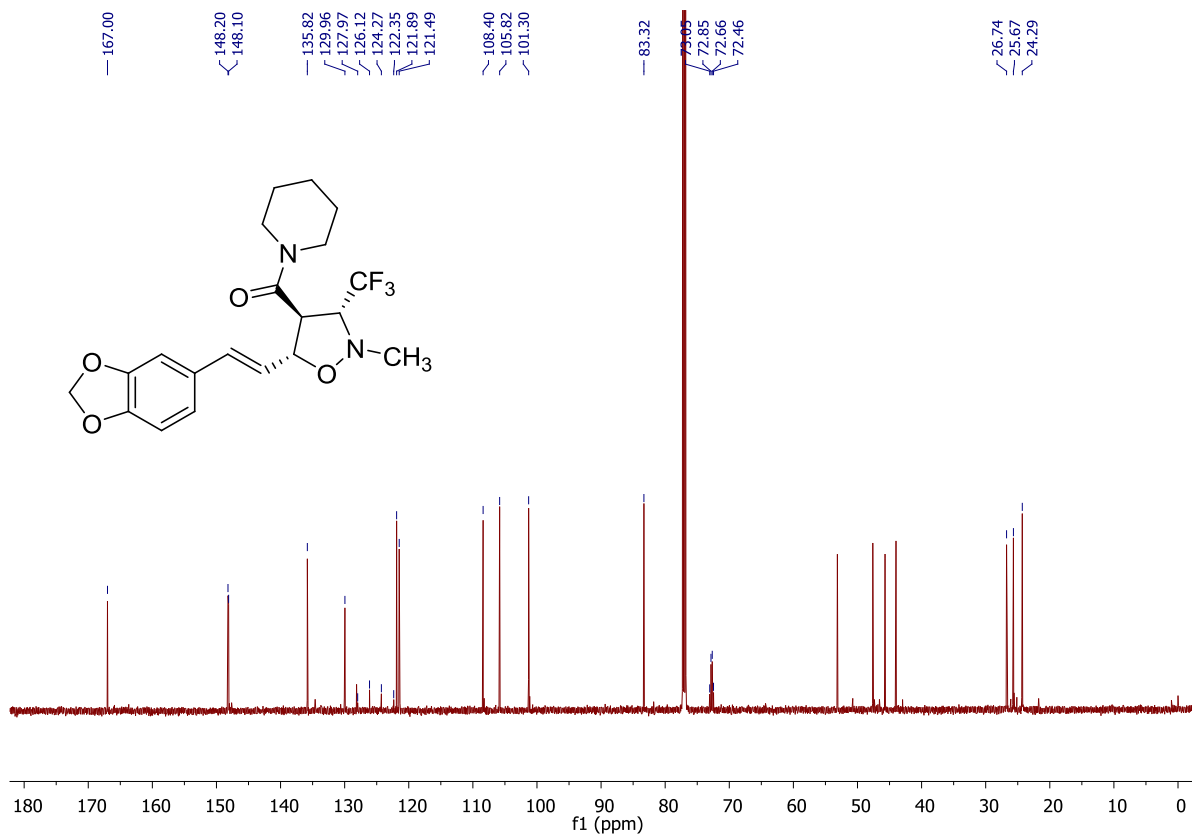

Compound 6aA,  $^{13}\text{C}$  NMR ( $\text{CDCl}_3$ )

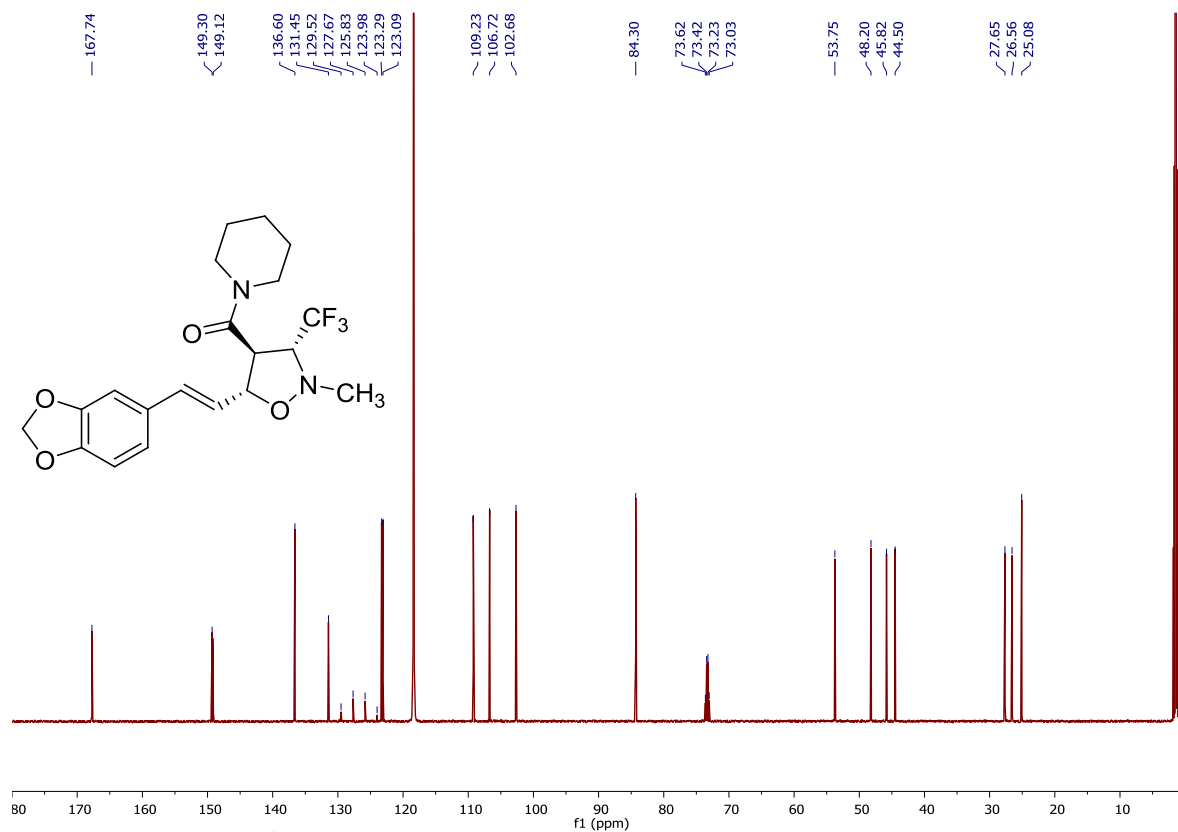

Compound 6aA,  $^{13}\text{C}$  NMR ( $\text{CD}_3\text{CN}$ )

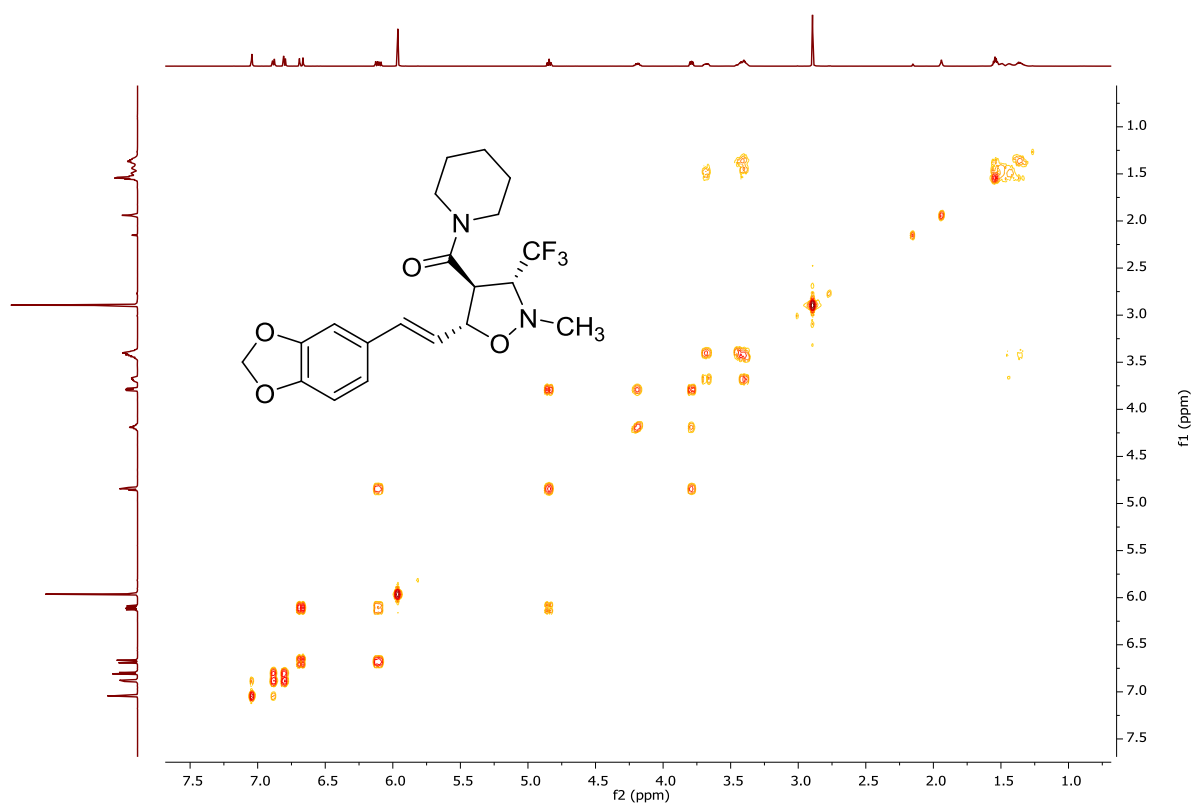

Compound 6aA, <sup>1</sup>H-<sup>1</sup>H COSY NMR (CD<sub>3</sub>CN)

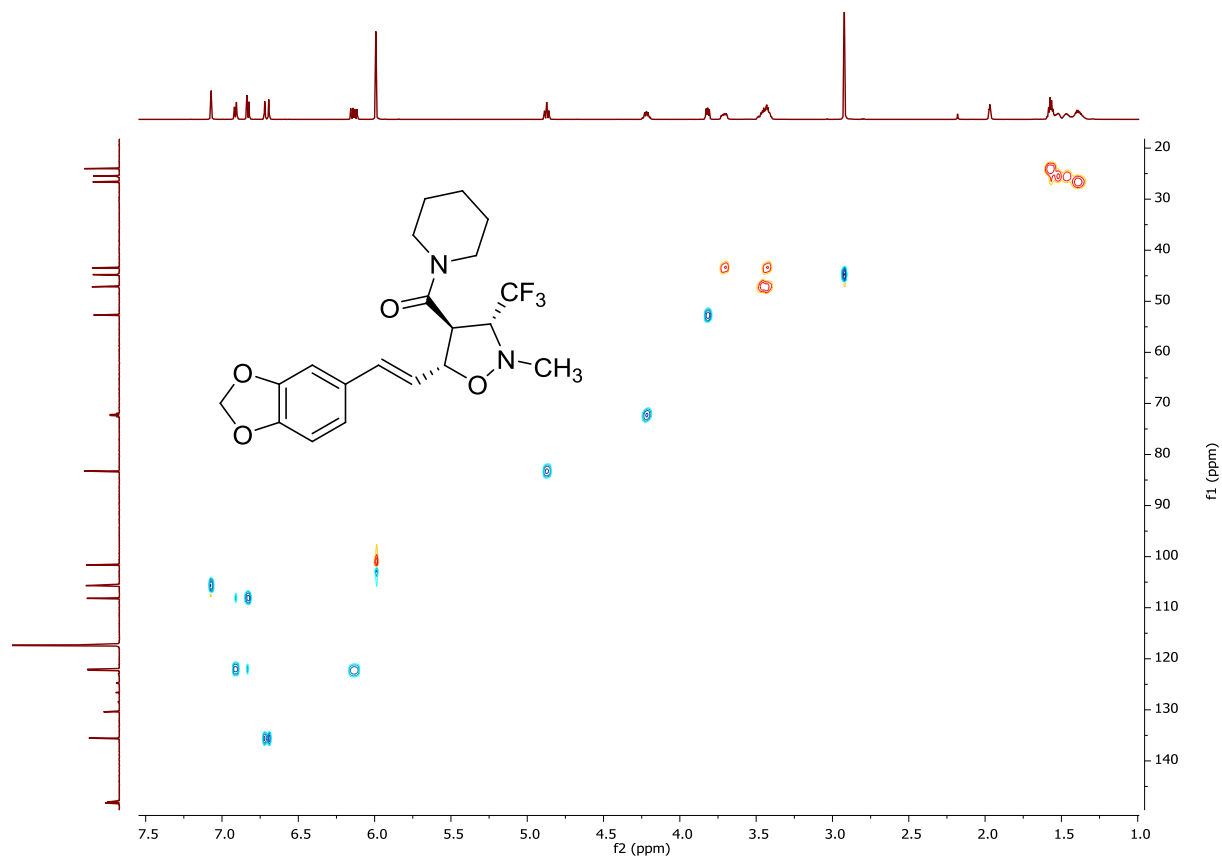

Compound 6aA, <sup>1</sup>H-<sup>13</sup>C HSQC NMR (CD<sub>3</sub>CN)

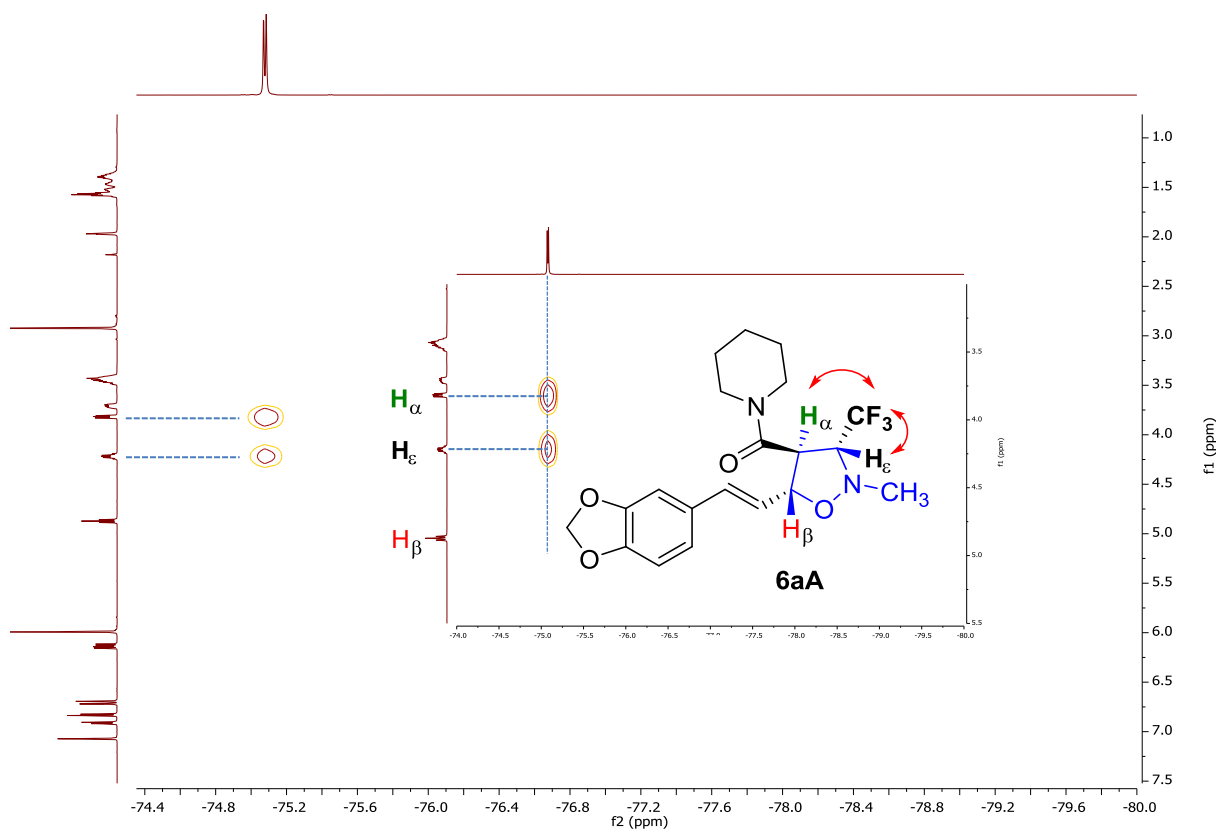

**Compound 6aA,  $^1\text{H}$ - $^{19}\text{F}$  HOESY NMR ( $\text{CD}_3\text{CN}$ )**

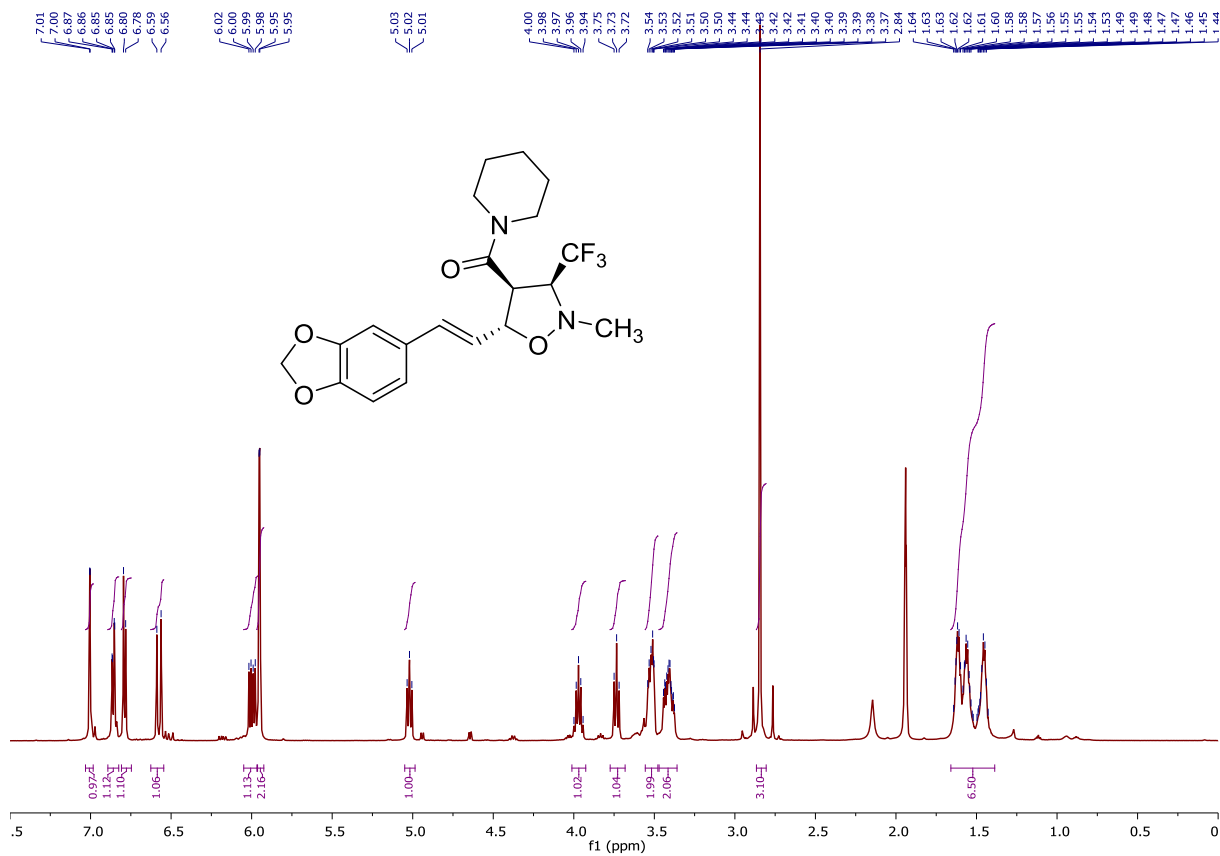

**Compound 6aB,  $^1\text{H}$  NMR ( $\text{CD}_3\text{CN}$ )**

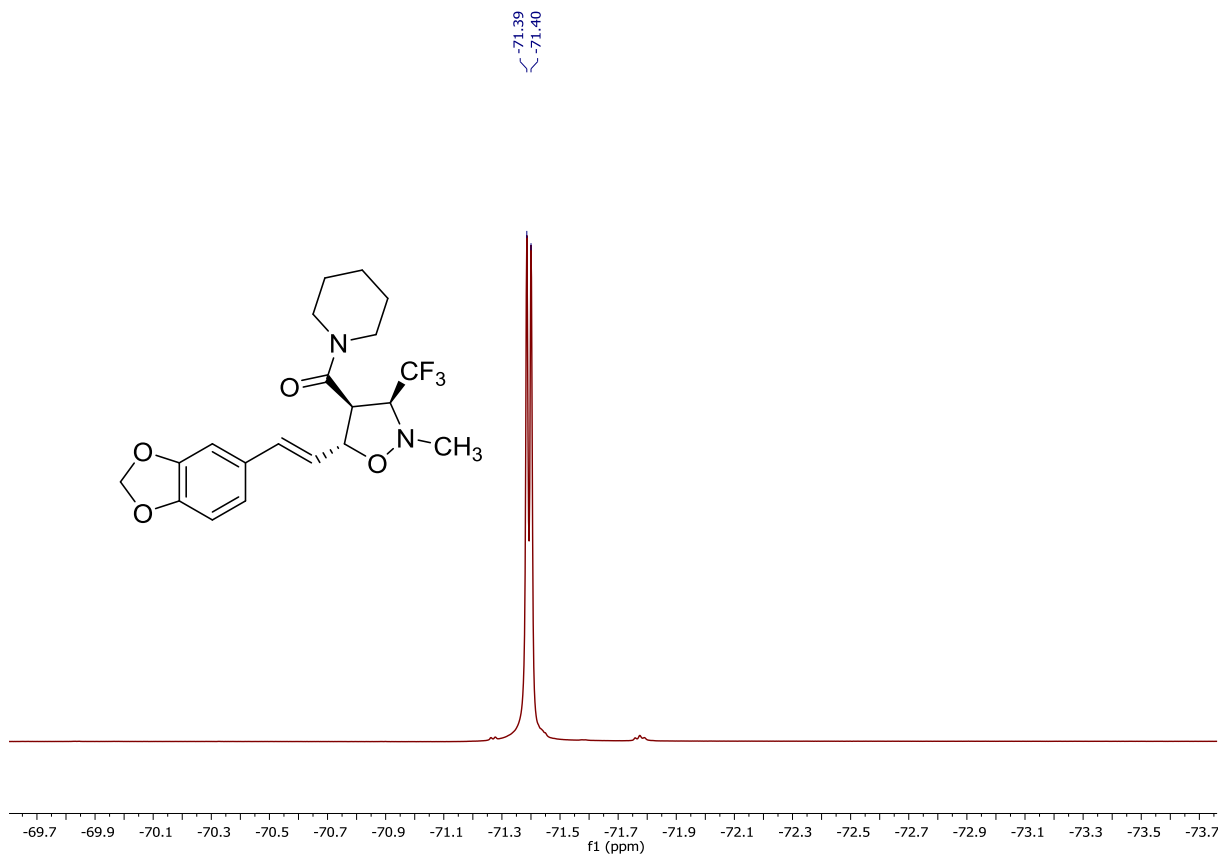

**Compound 6aB, <sup>19</sup>F NMR (CD<sub>3</sub>CN)**

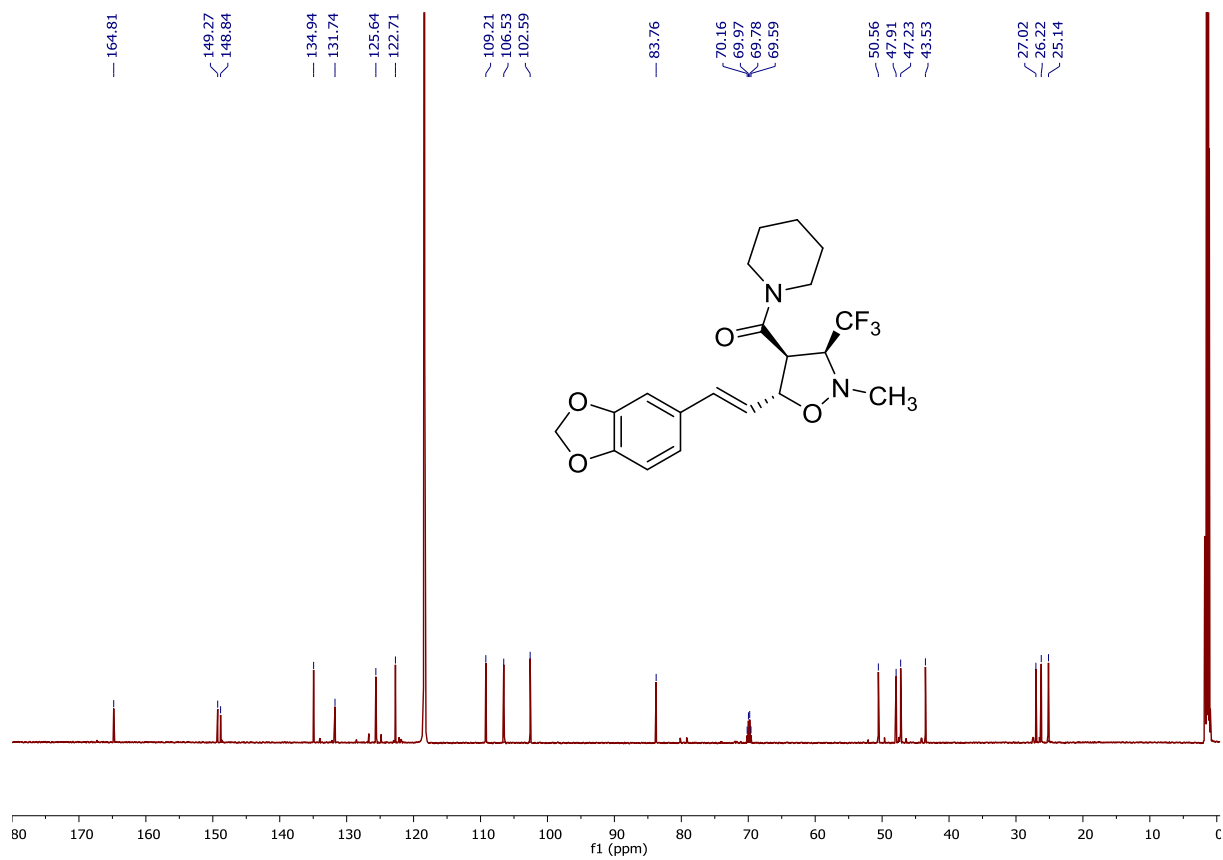

**Compound 6aB, <sup>13</sup>C NMR (CD<sub>3</sub>CN)**

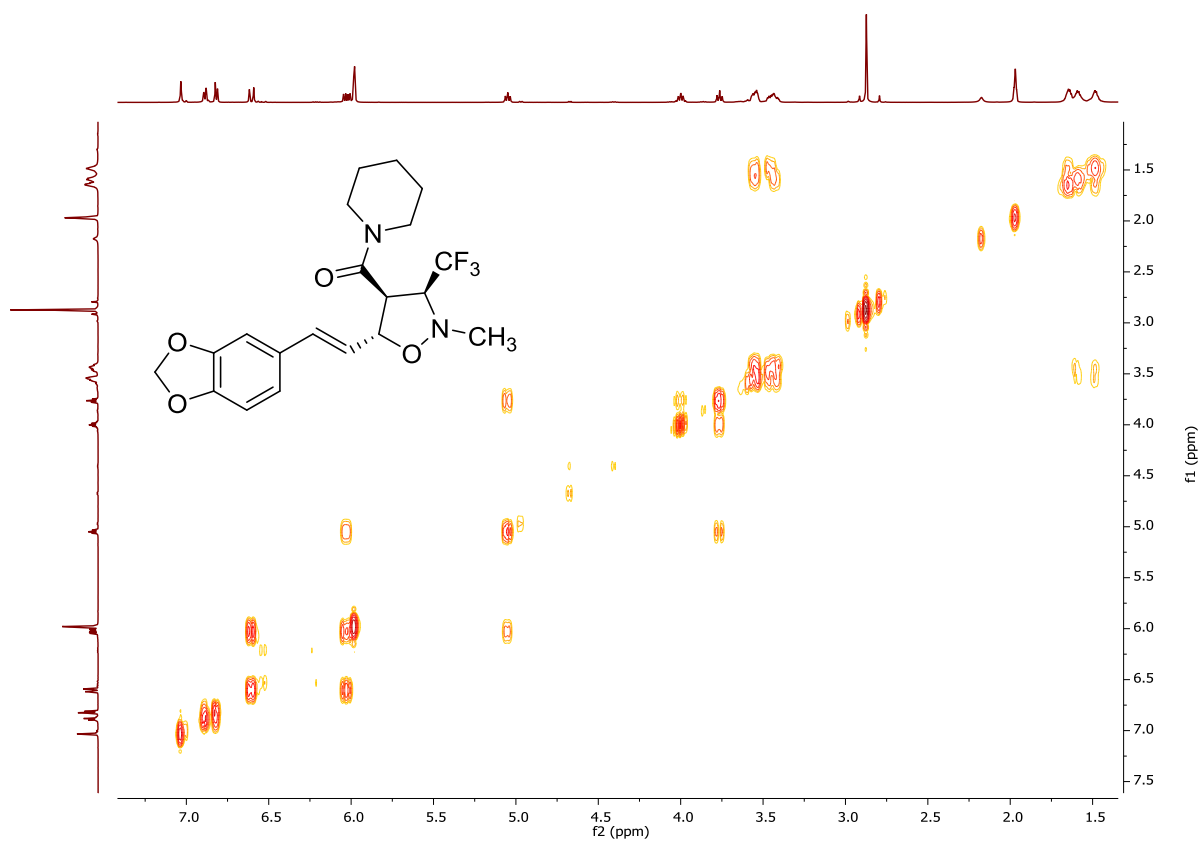

Compound 6aB,  $^1\text{H}$ - $^1\text{H}$  COSY NMR ( $\text{CD}_3\text{CN}$ )

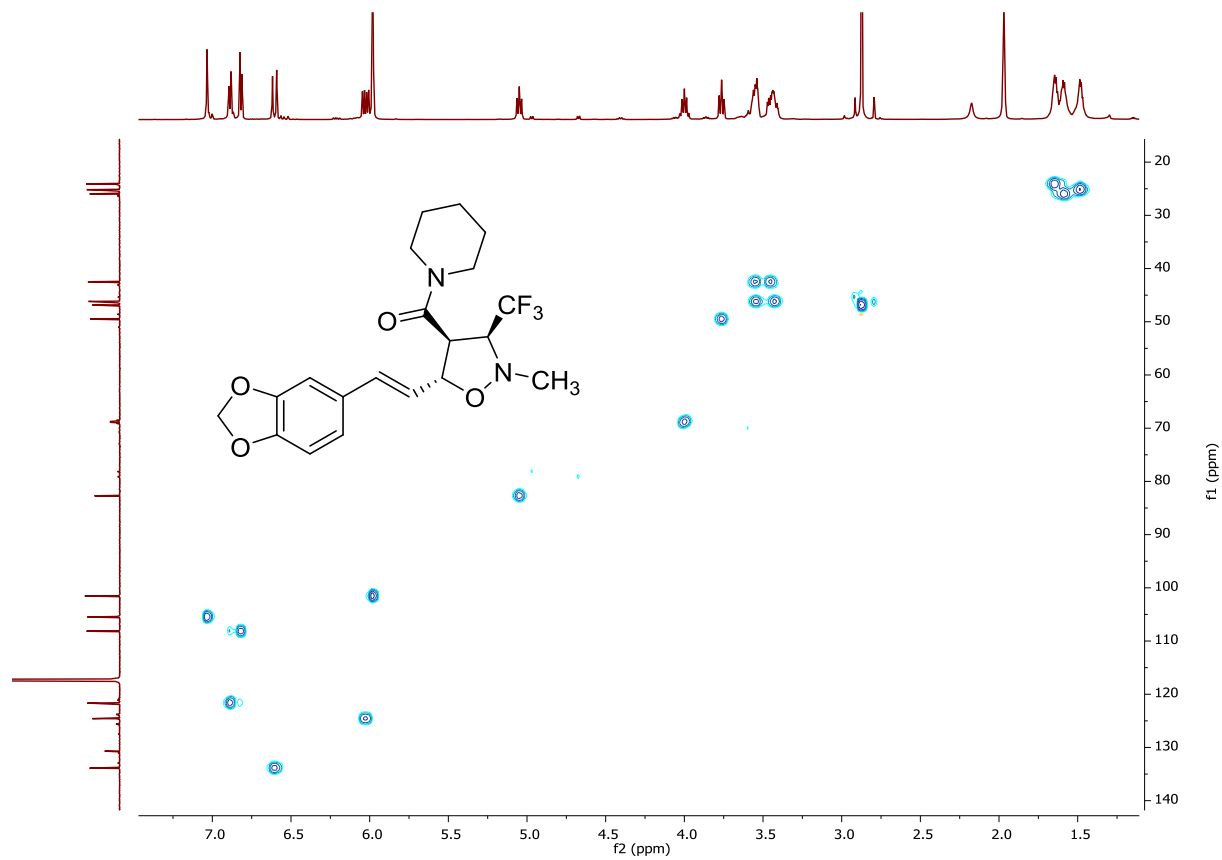

Compound 6aB,  $^1\text{H}$ - $^{13}\text{C}$  HSQC NMR ( $\text{CD}_3\text{CN}$ )

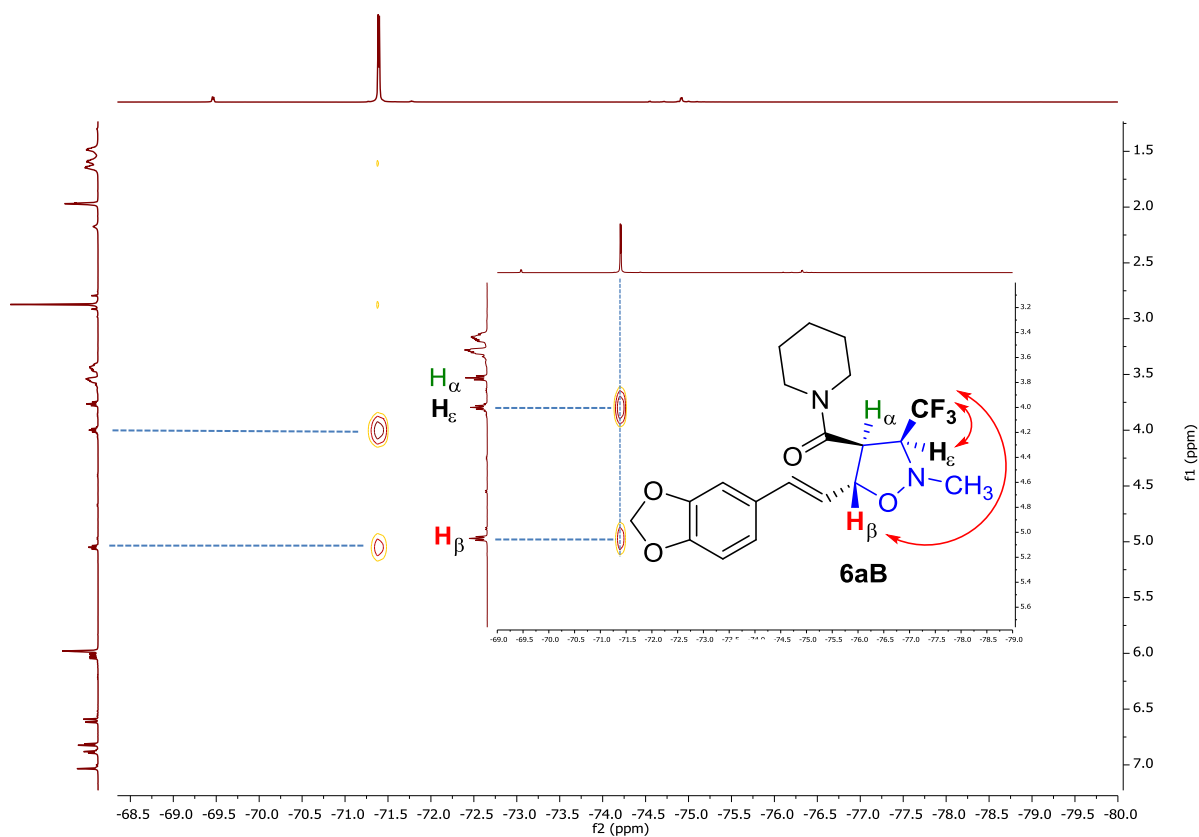

Compound 6aB,  $^1\text{H}$ - $^{19}\text{F}$  HOESY NMR ( $\text{CD}_3\text{CN}$ )

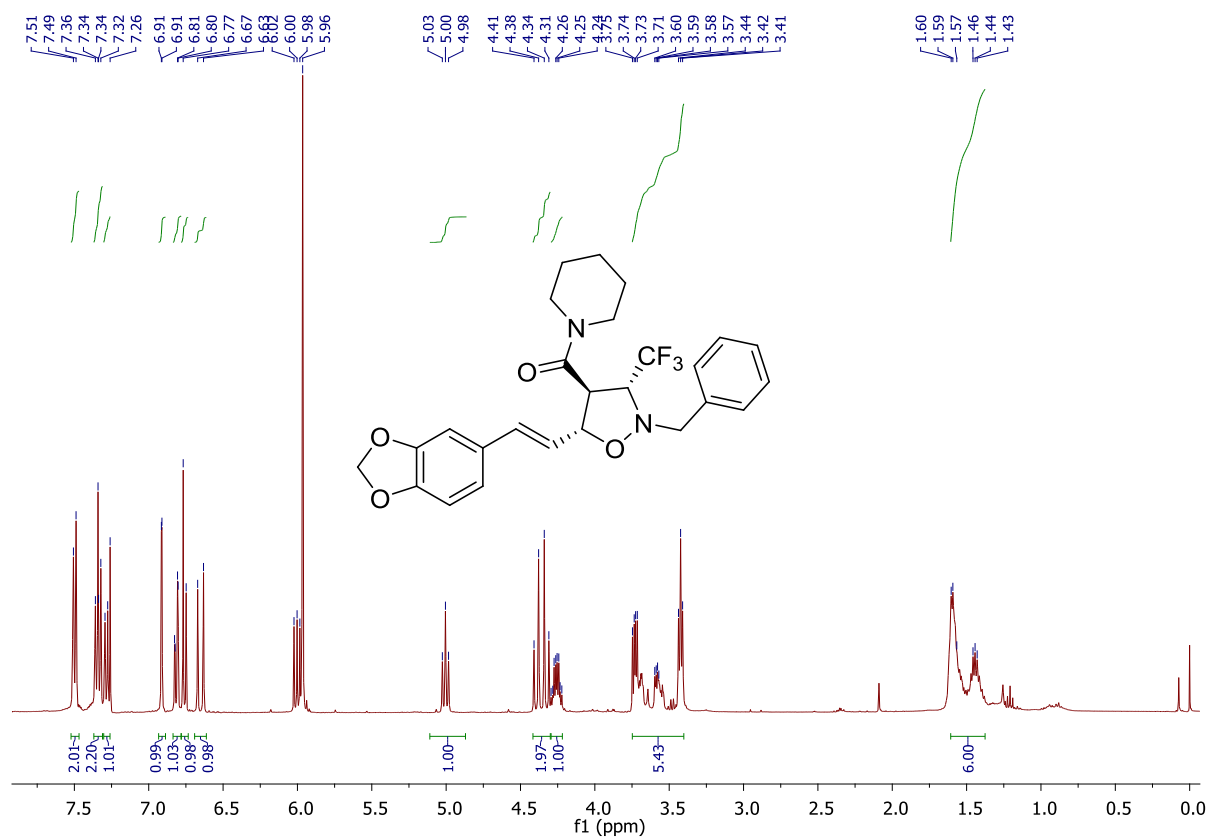

Compound 6aA,  $^1\text{H}$  NMR ( $\text{CDCl}_3$ )



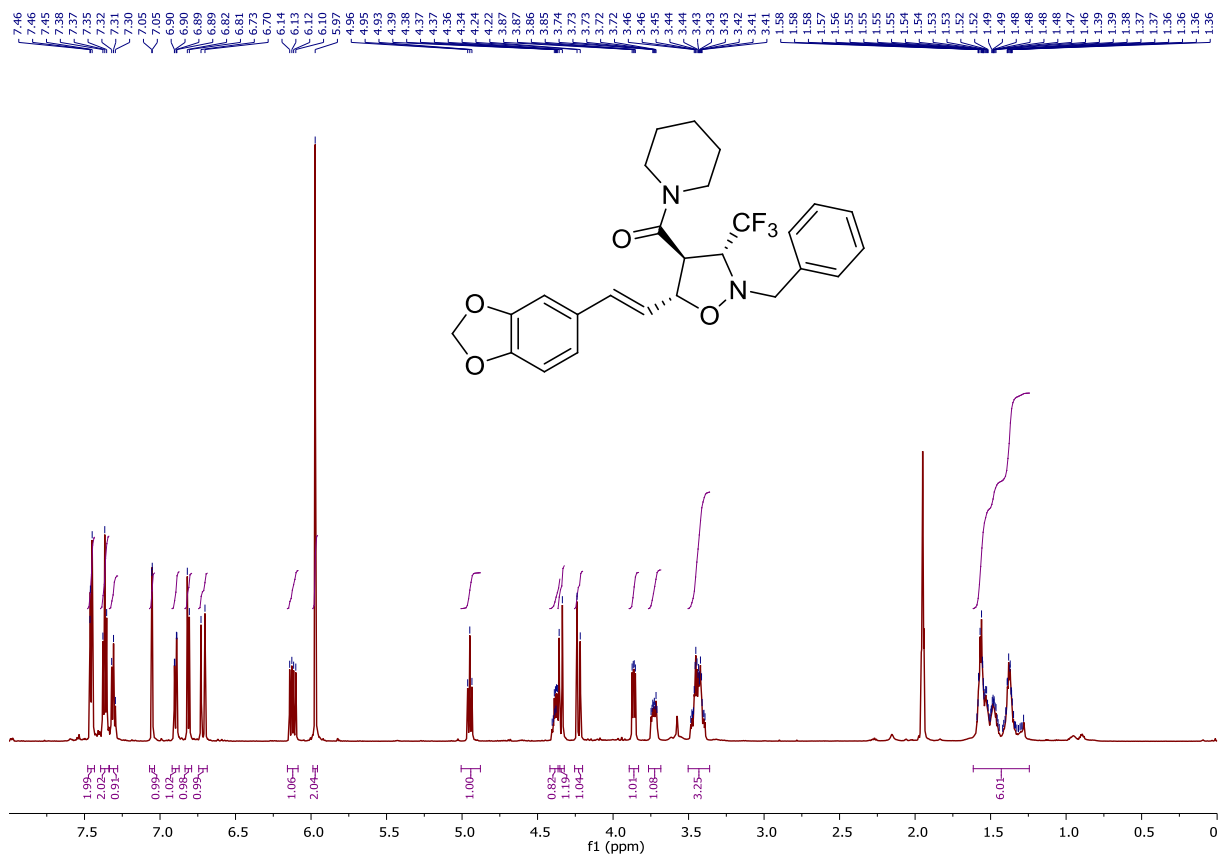

**Compound 6a, <sup>1</sup>H NMR (CD<sub>3</sub>CN)**

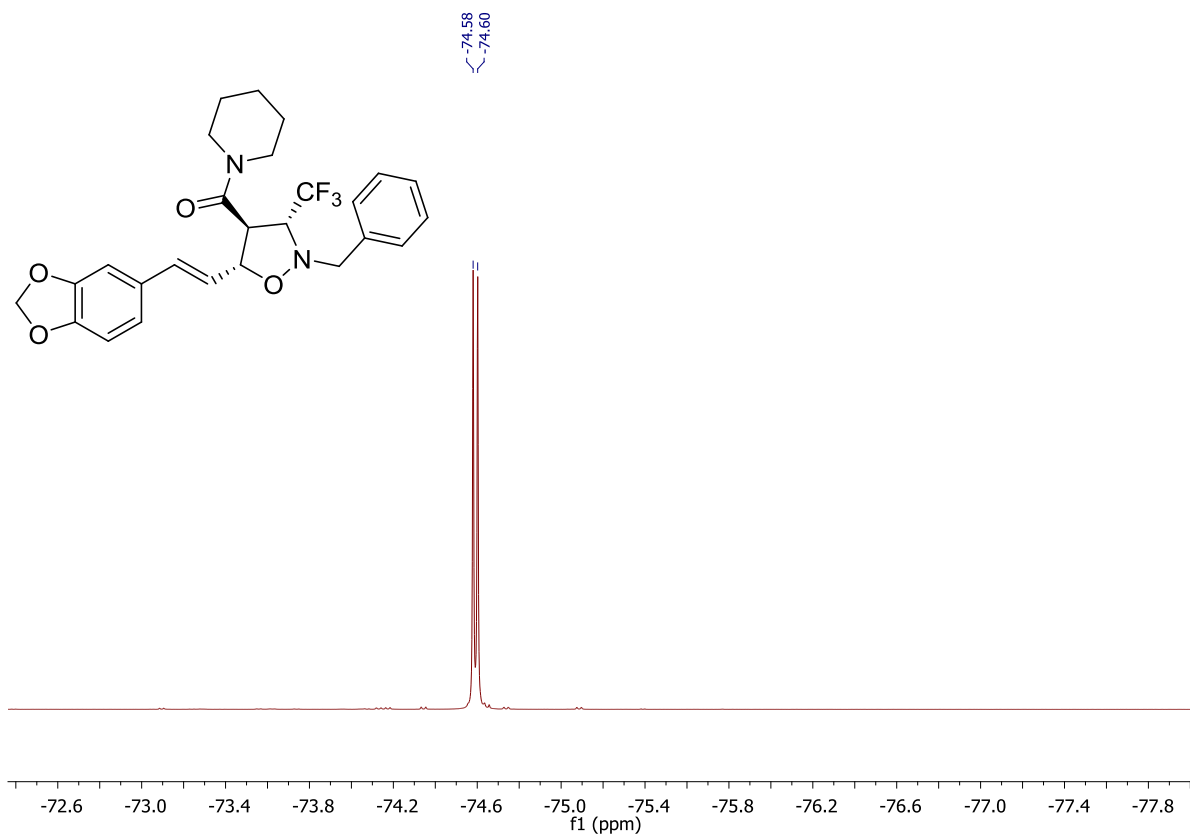

**Compound 6a, <sup>19</sup>F NMR (CDCl<sub>3</sub>)**

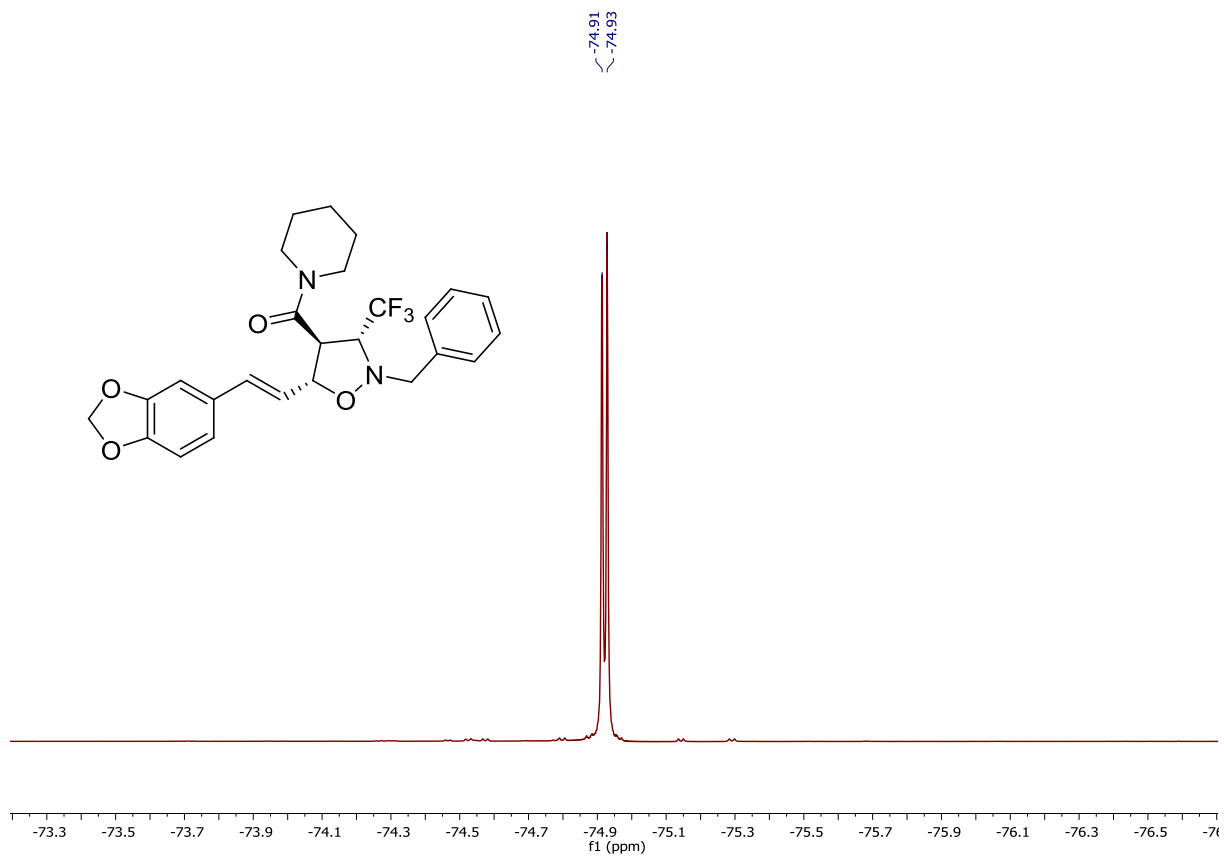

**Compound 6a,  $^{13}\text{C}$  NMR ( $\text{CDCl}_3$ )**

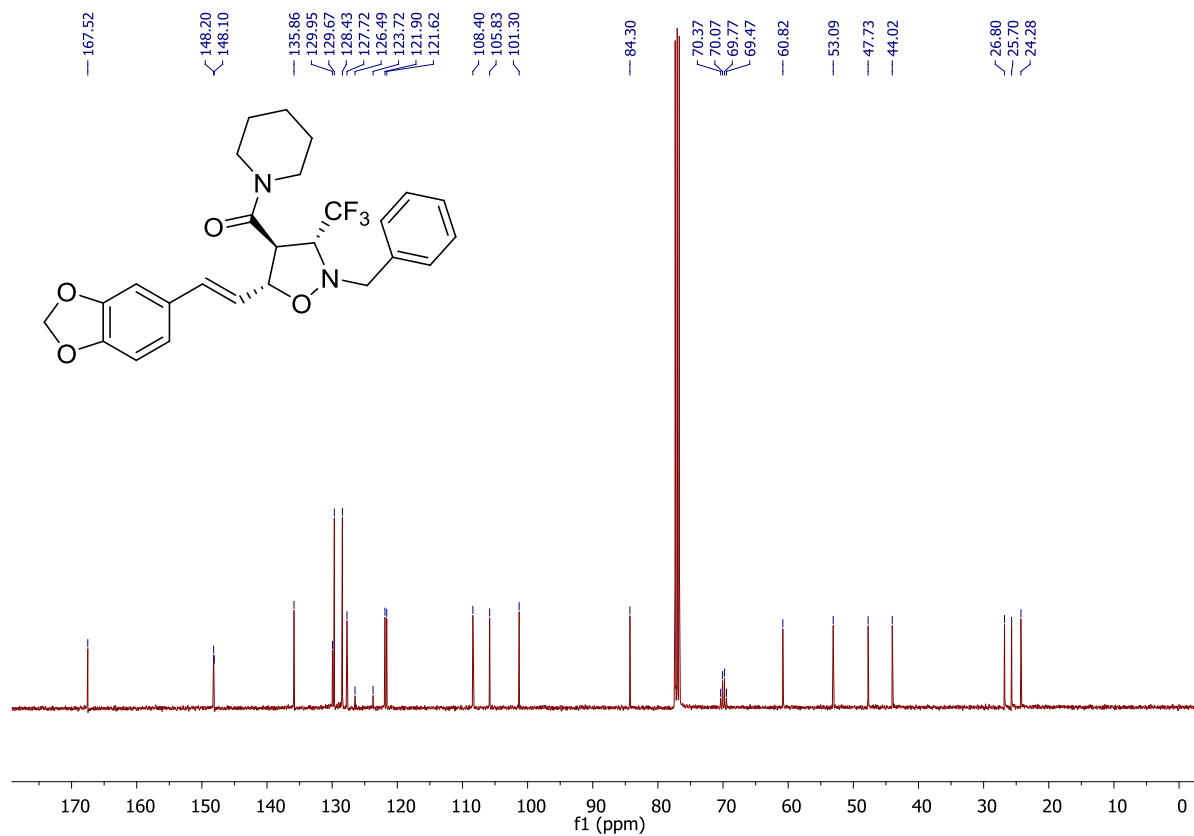

**Compound 6a,  $^{13}\text{C}$  NMR ( $\text{CDCl}_3$ )**

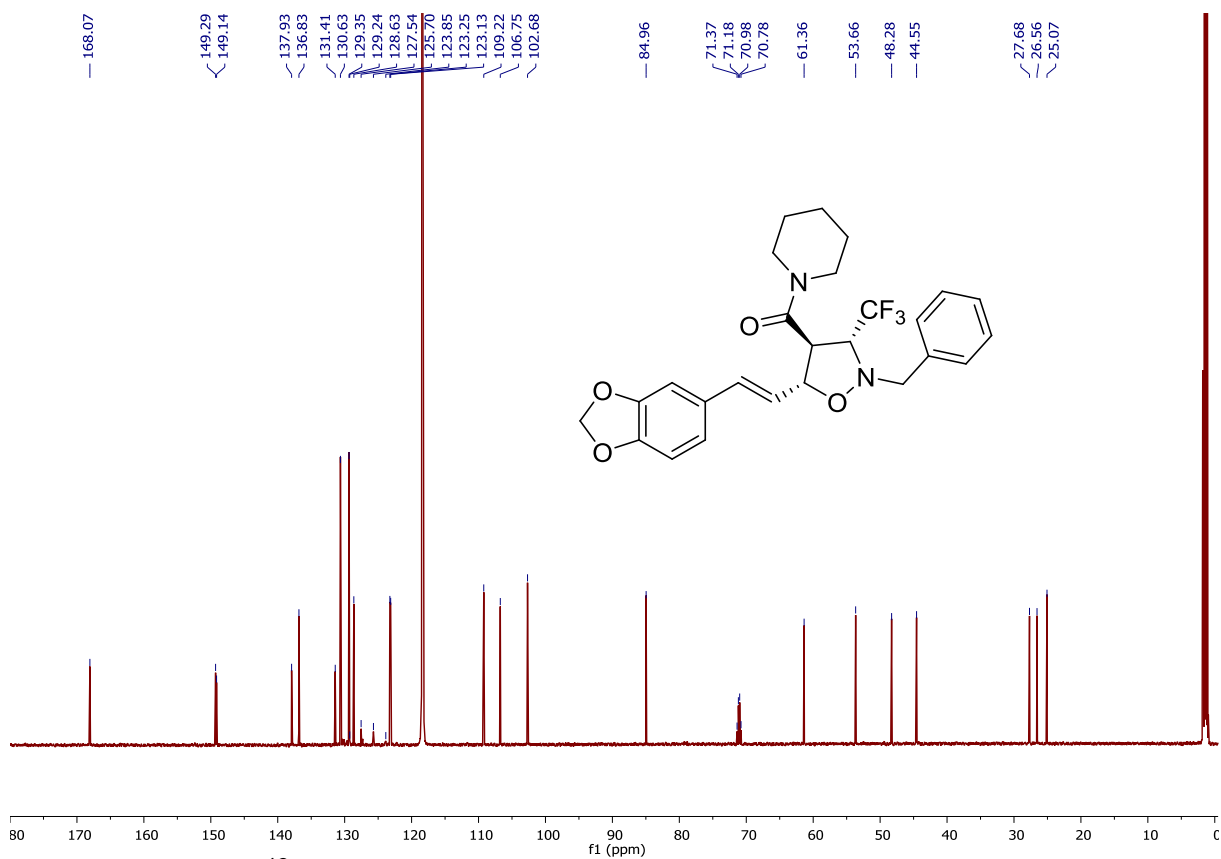

Compound 6a,  $^{13}\text{C}$  NMR ( $\text{CD}_3\text{CN}$ )

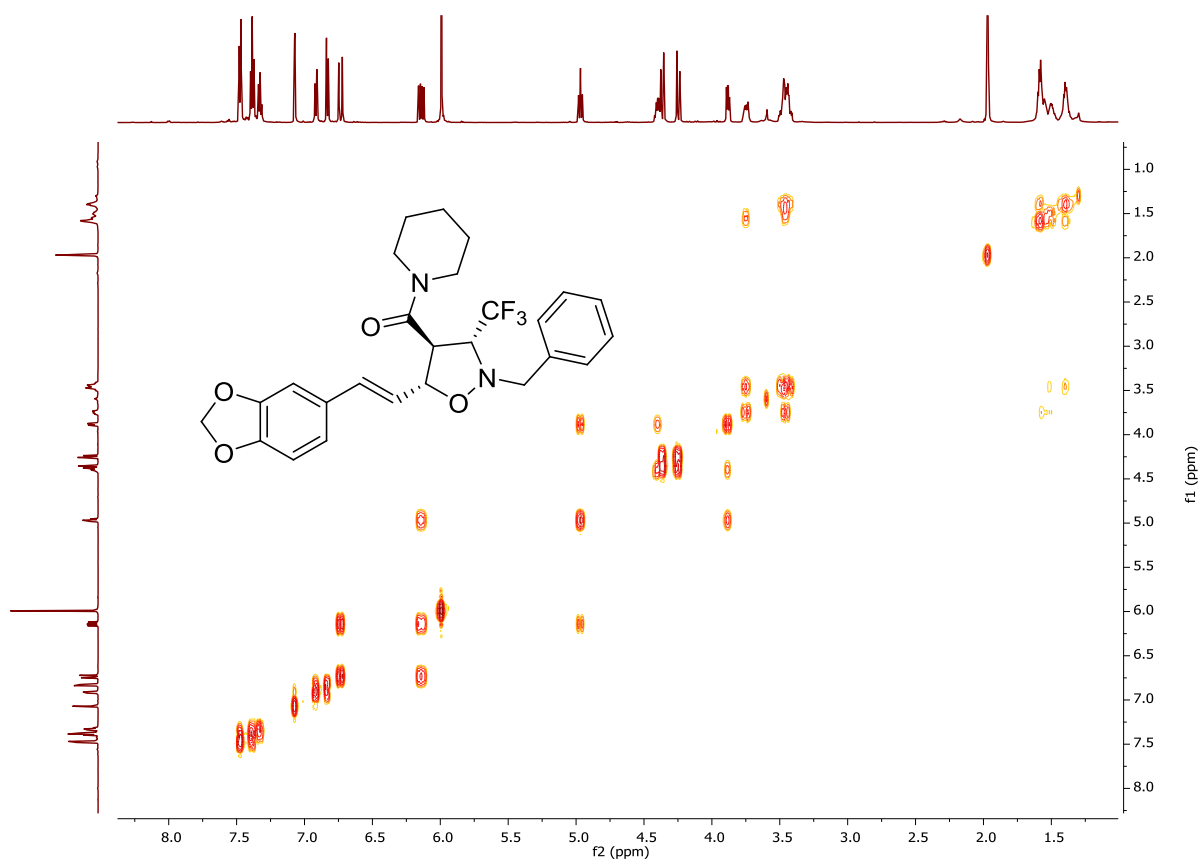

Compound 6a,  $^1\text{H}$ - $^1\text{H}$  COSY NMR ( $\text{CD}_3\text{CN}$ )

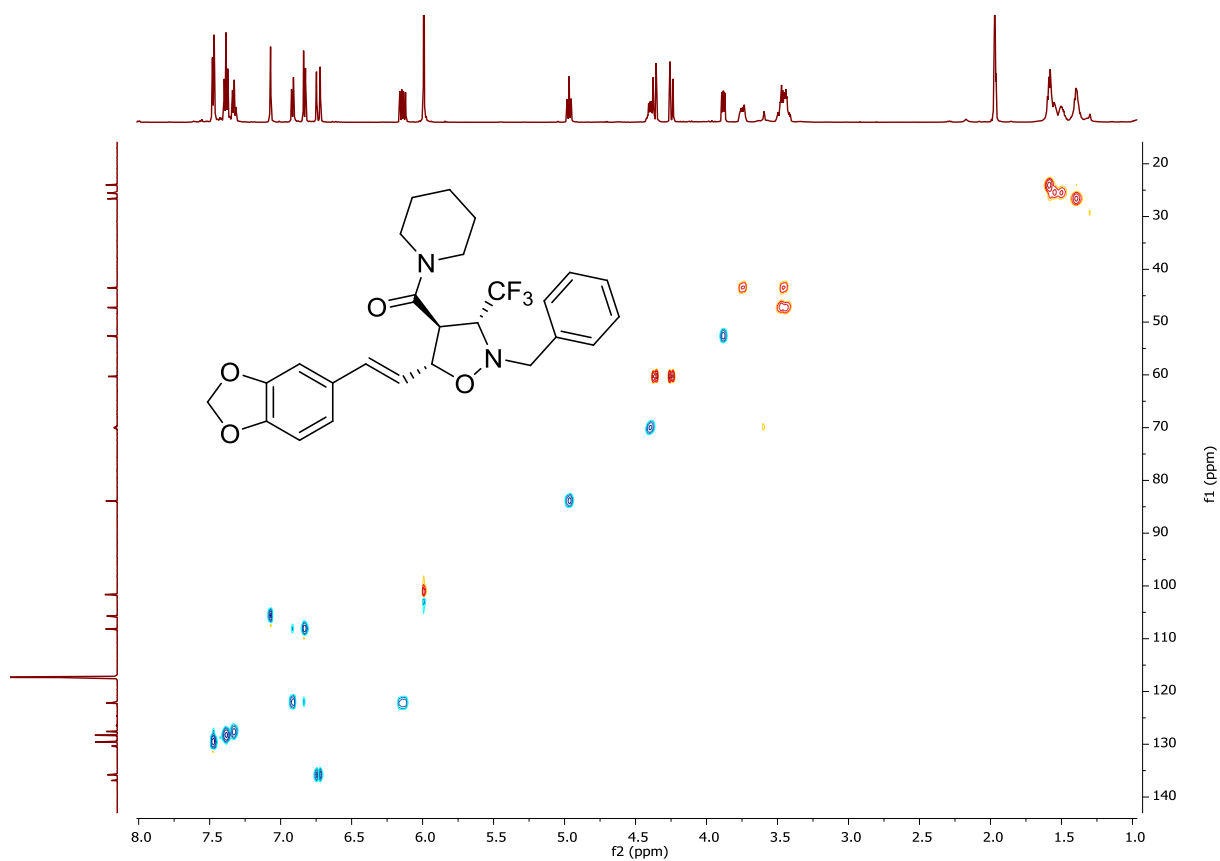

Compound 6a,  $^1\text{H}$ - $^{13}\text{C}$  HSQC NMR ( $\text{CD}_3\text{CN}$ )

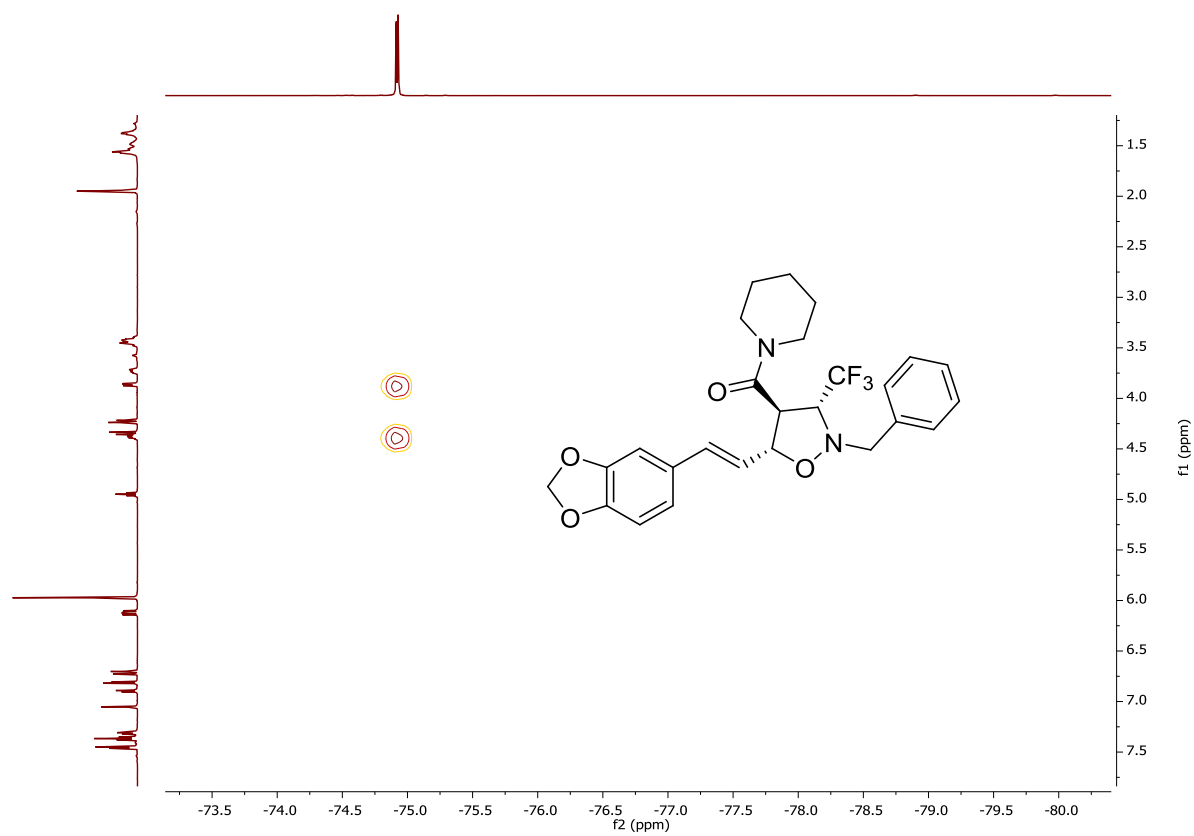

Compound 6a,  $^1\text{H}$ - $^{19}\text{F}$  HOESY NMR ( $\text{CD}_3\text{CN}$ )

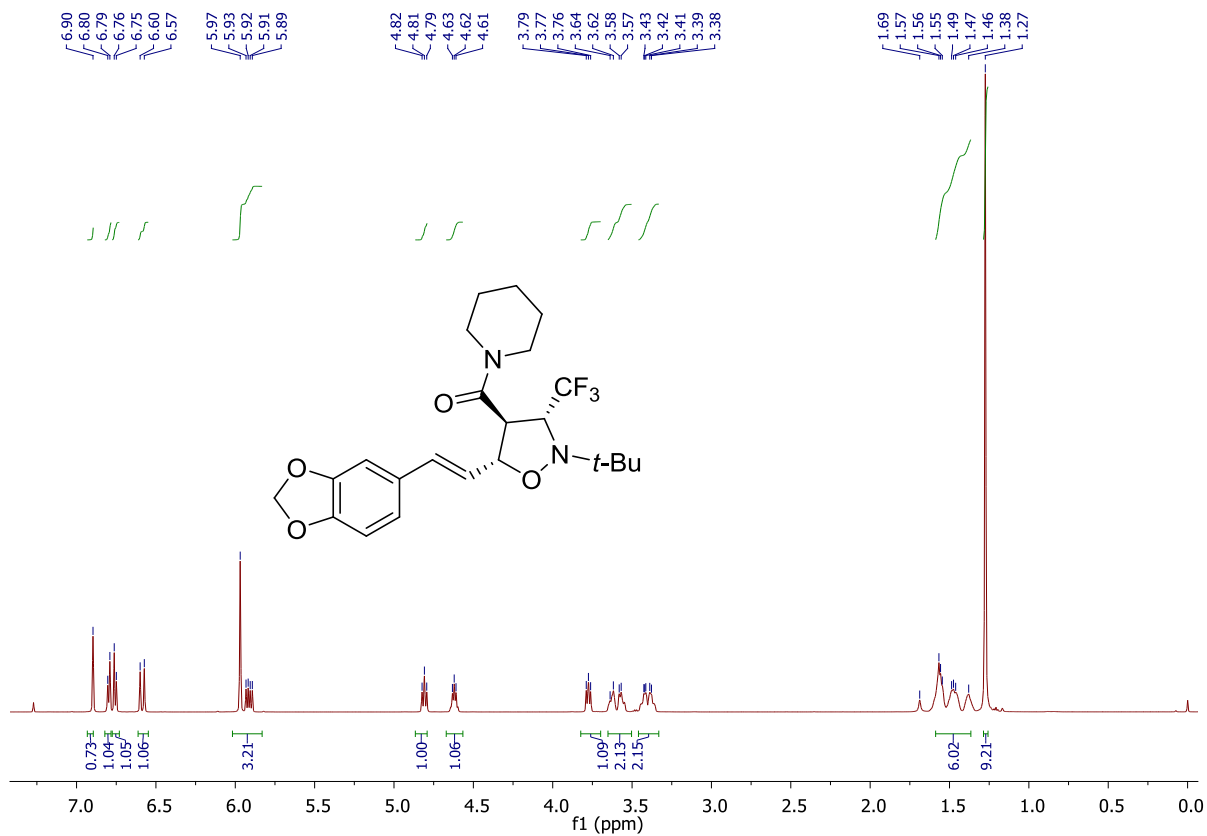

Compound 6cA, <sup>1</sup>H NMR (CDCl<sub>3</sub>)

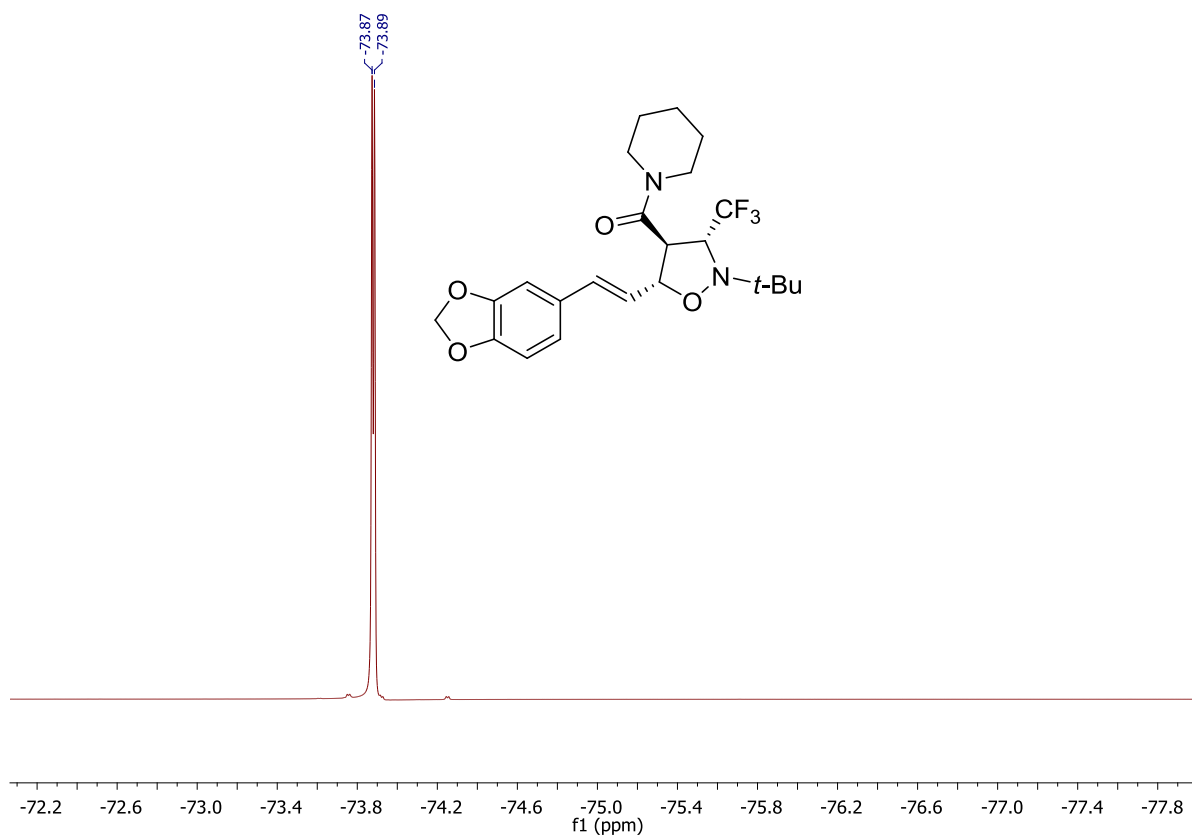

Compound 6cA, <sup>19</sup>F NMR (CDCl<sub>3</sub>)

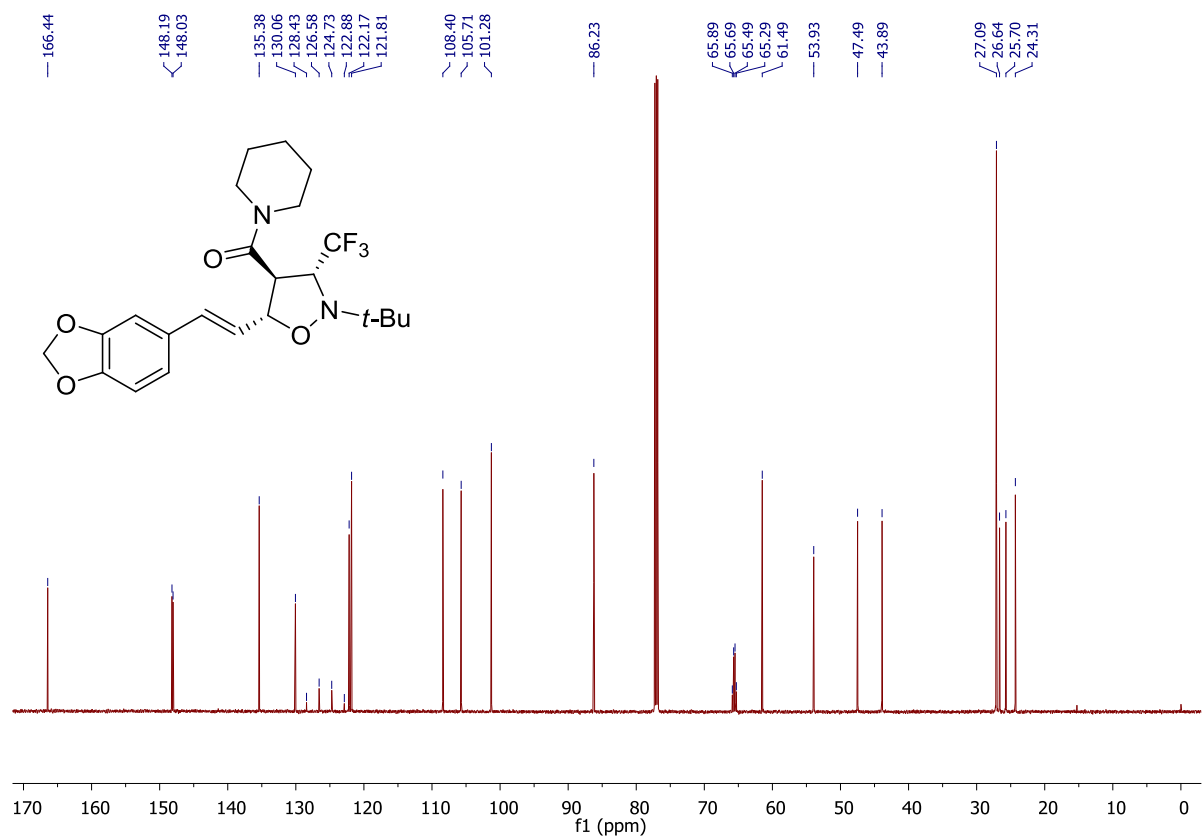

Compound 6cA,  $^{13}\text{C}$  NMR ( $\text{CDCl}_3$ )

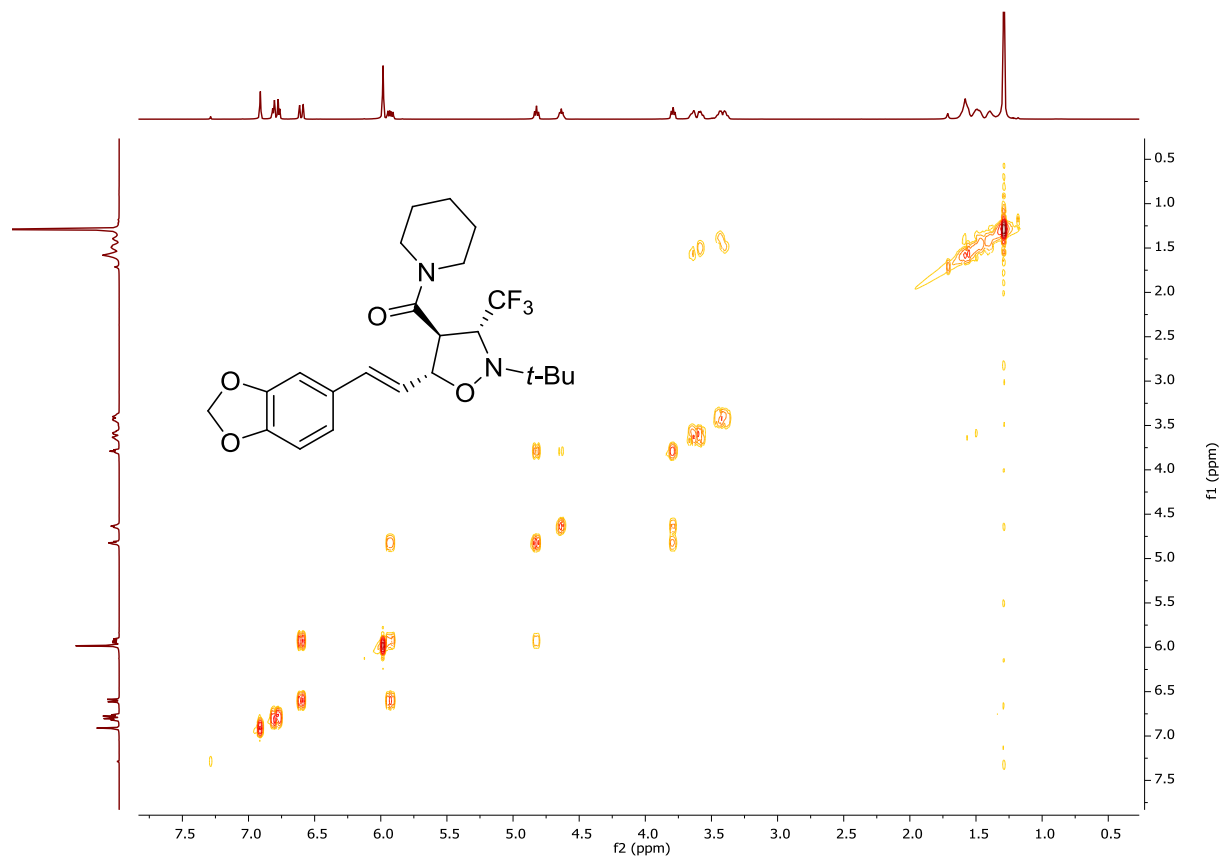

Compound 6cA,  $^1\text{H}$ - $^1\text{H}$  COSY NMR ( $\text{CDCl}_3$ )

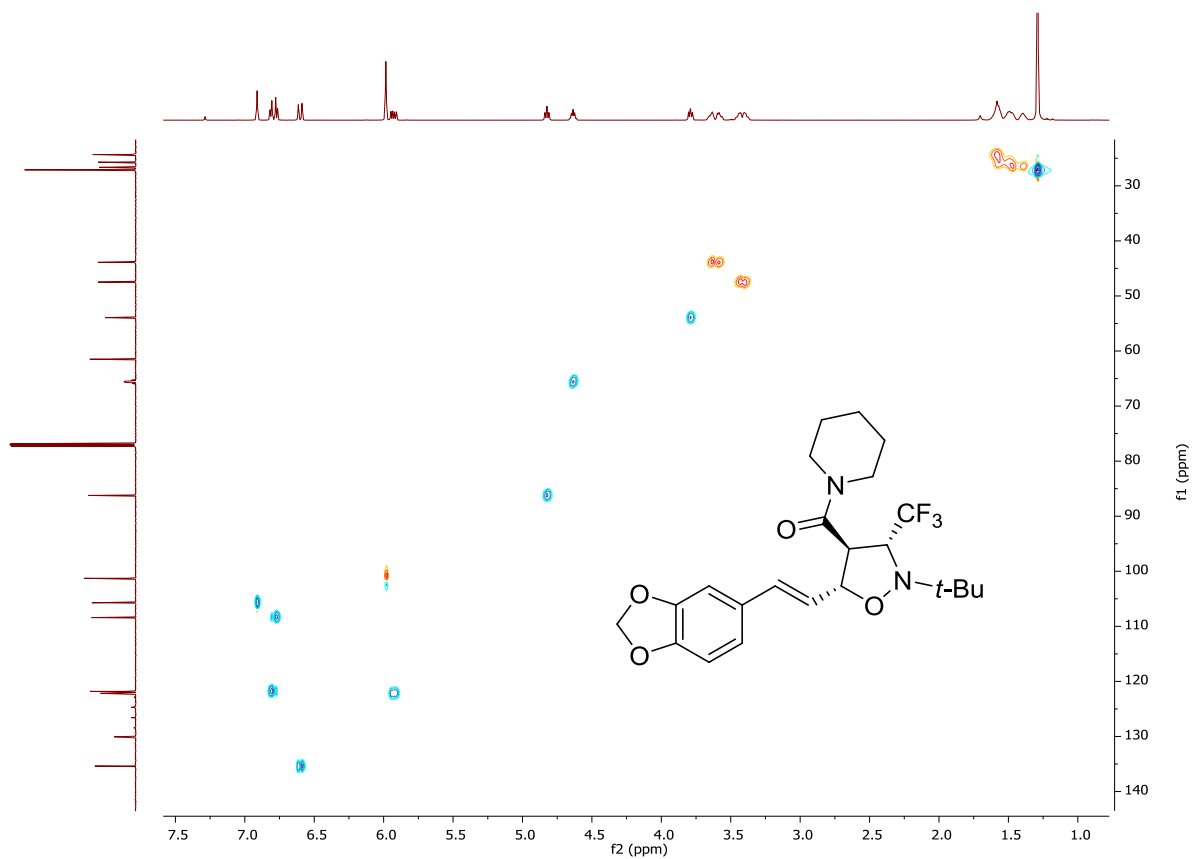

Compound 6cA,  $^1\text{H}$ - $^{13}\text{C}$  HSQC NMR ( $\text{CDCl}_3$ )

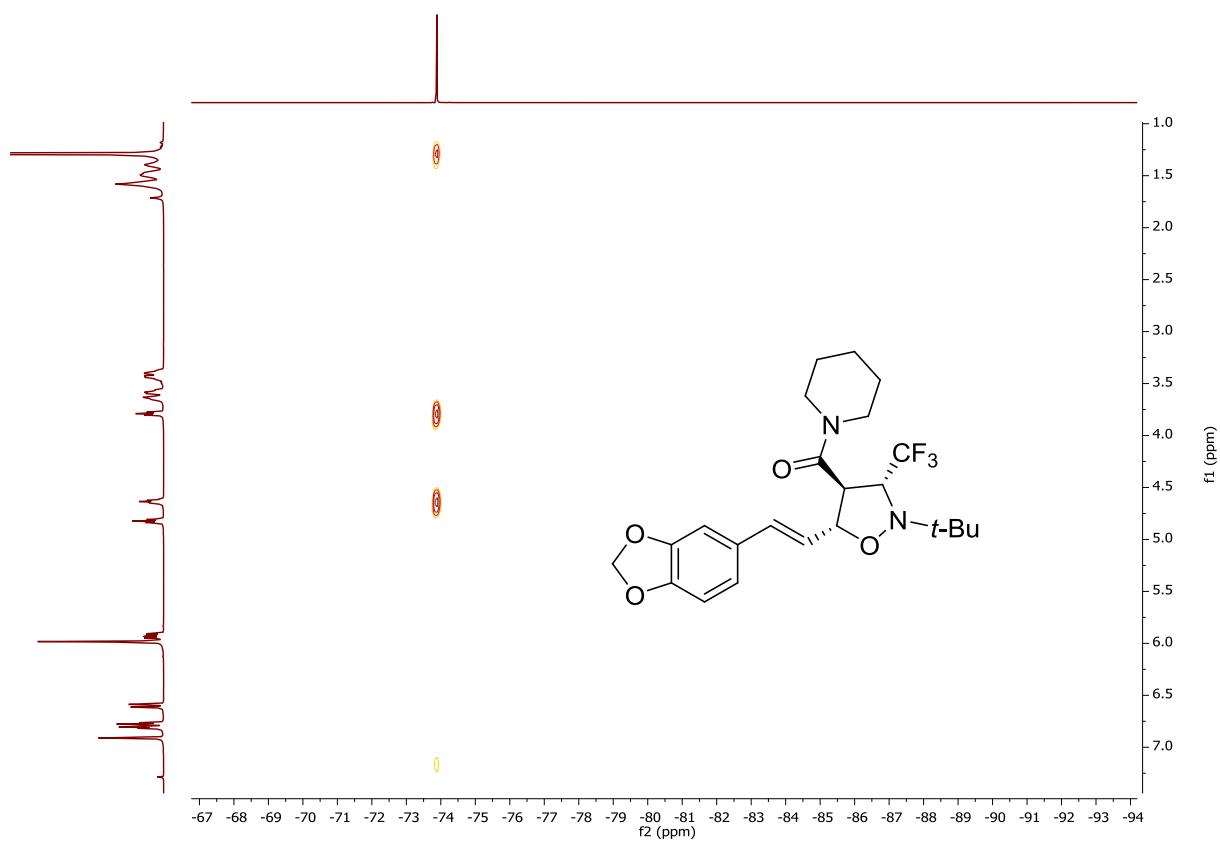

Compound 6cA,  $^1\text{H}$ - $^{19}\text{F}$  HOESY NMR ( $\text{CDCl}_3$ )

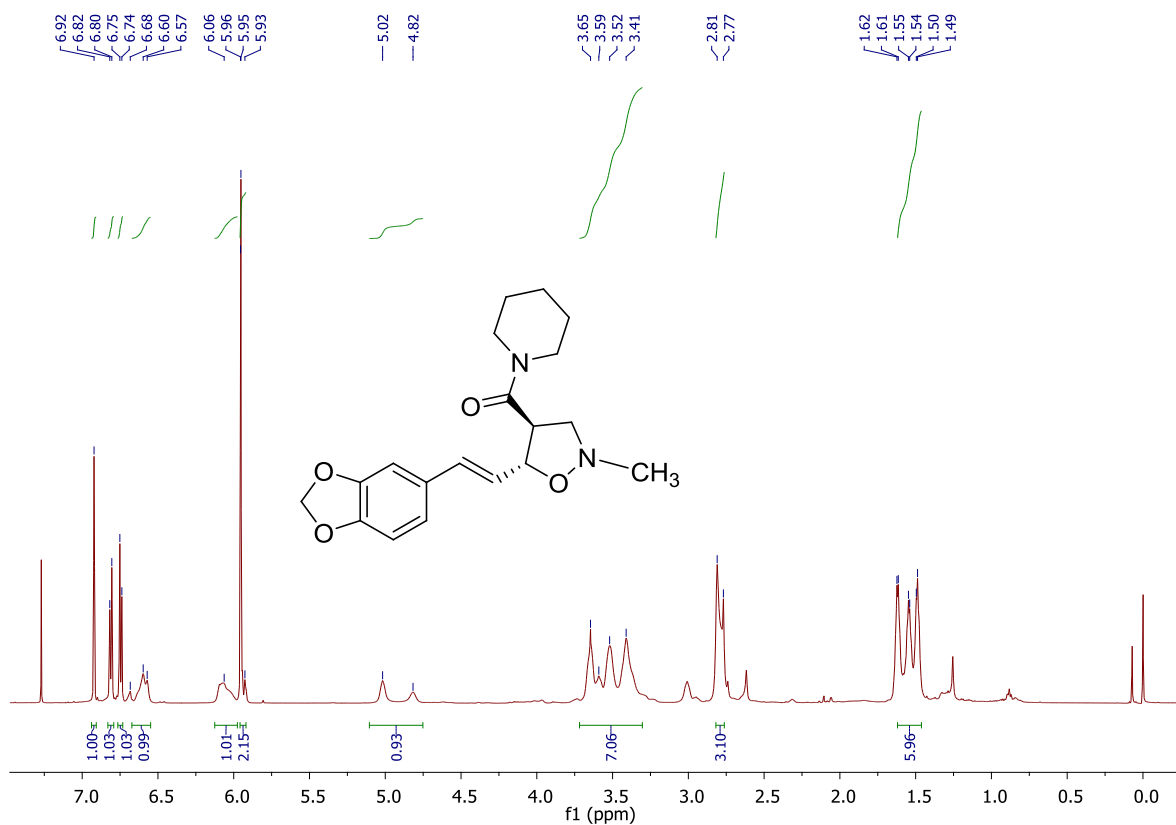

**Compound 7, <sup>1</sup>H NMR (CDCl<sub>3</sub>)**

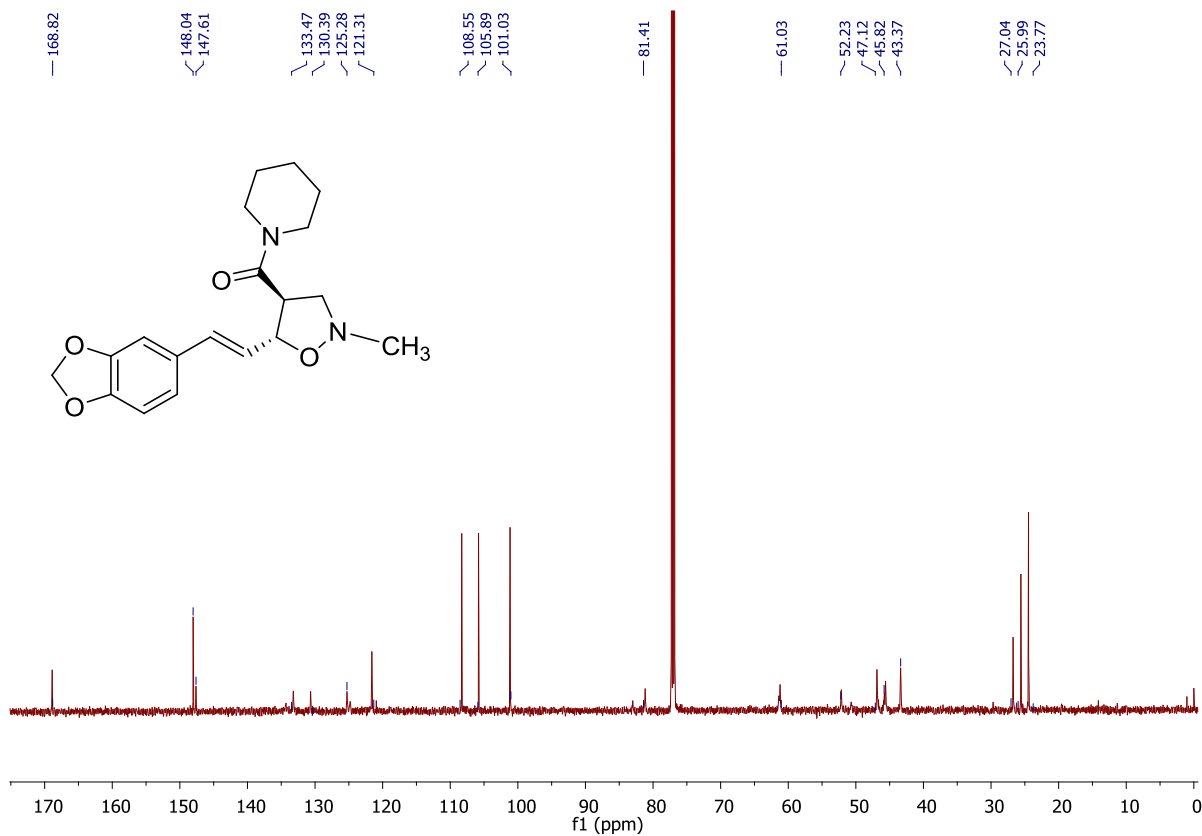

**Compound 7, <sup>13</sup>C NMR (CDCl<sub>3</sub>)**



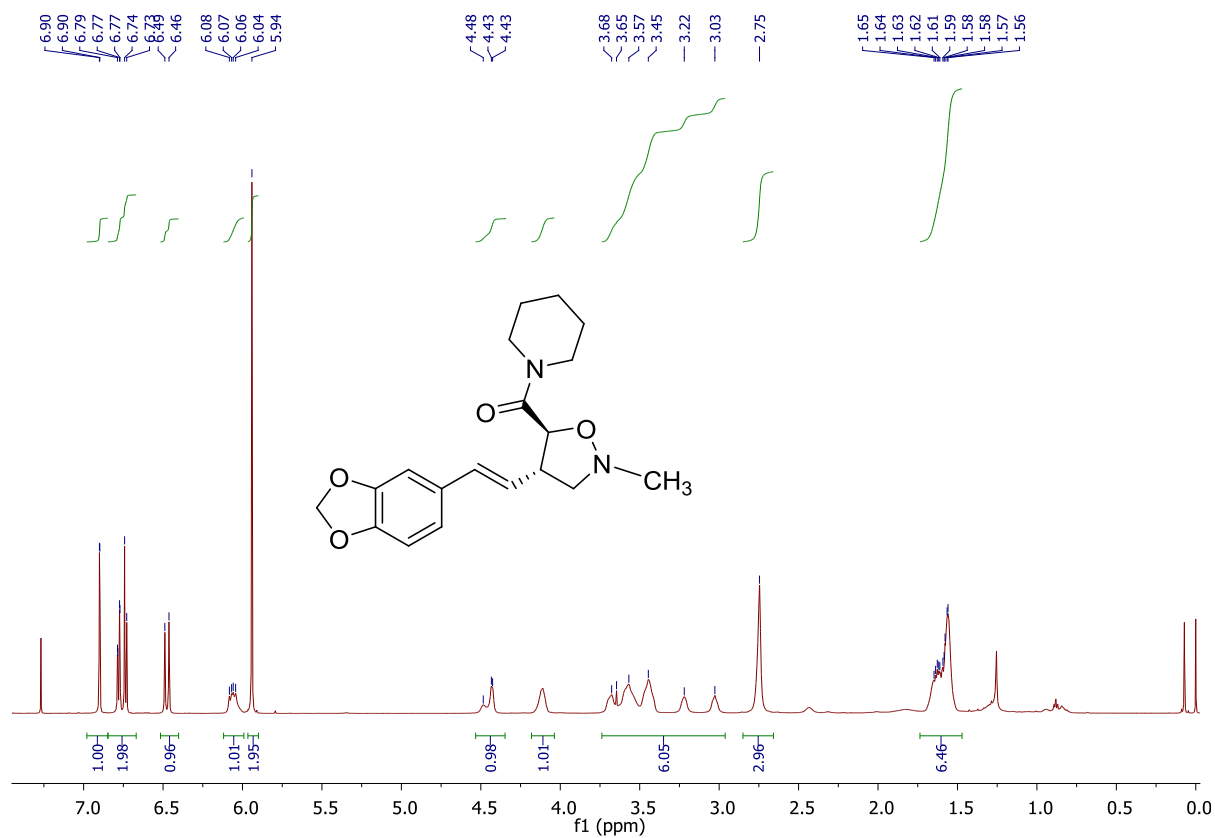

**Compound 8,  $^1\text{H}$  NMR ( $\text{CDCl}_3$ )**

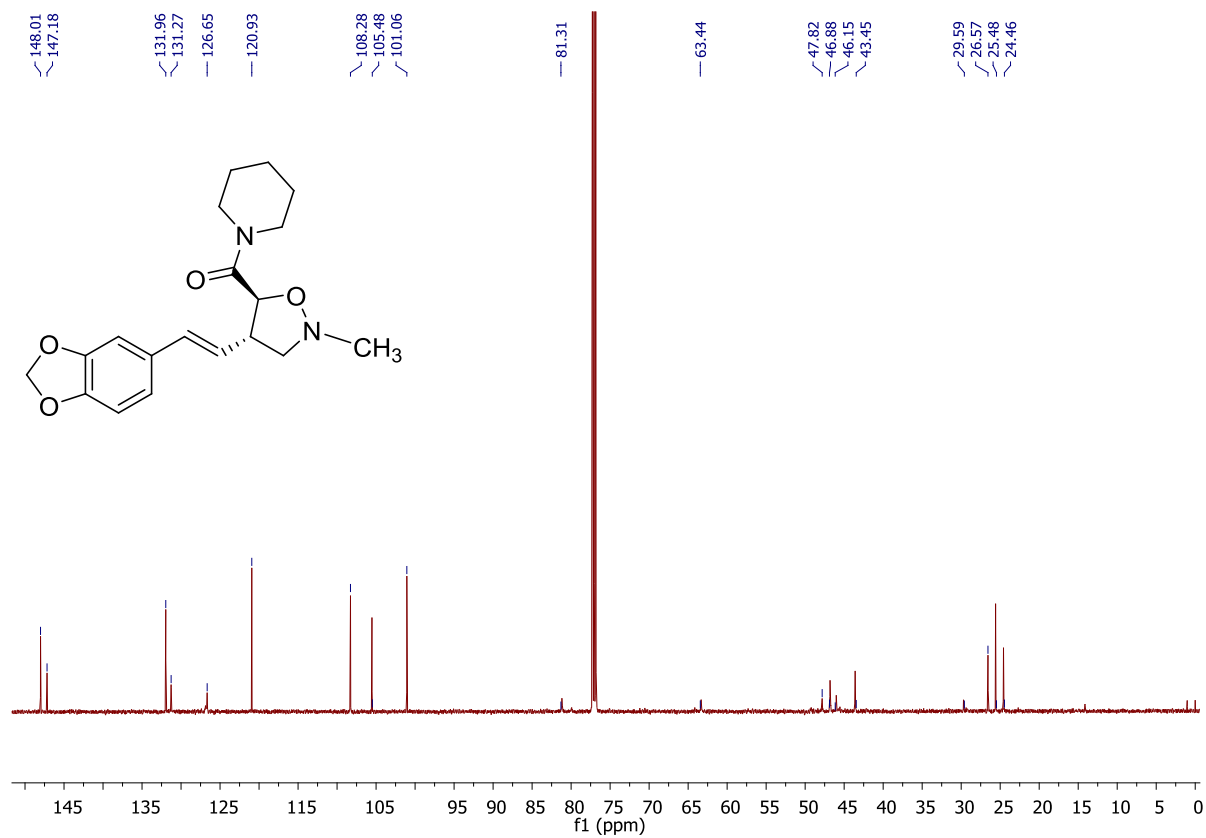

**Compound 8,  $^{13}\text{C}$  NMR ( $\text{CDCl}_3$ )**

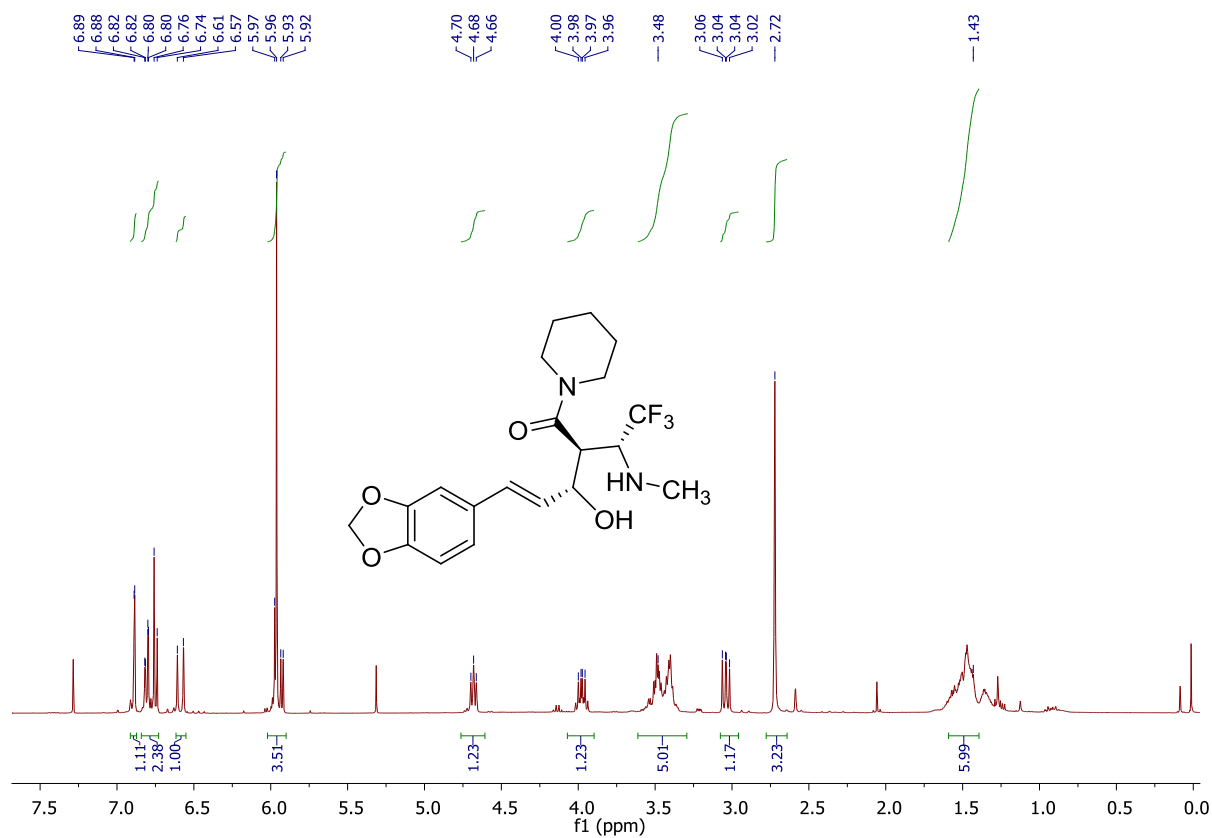

**Compound 10a,  $^1\text{H}$  NMR ( $\text{CDCl}_3$ )**

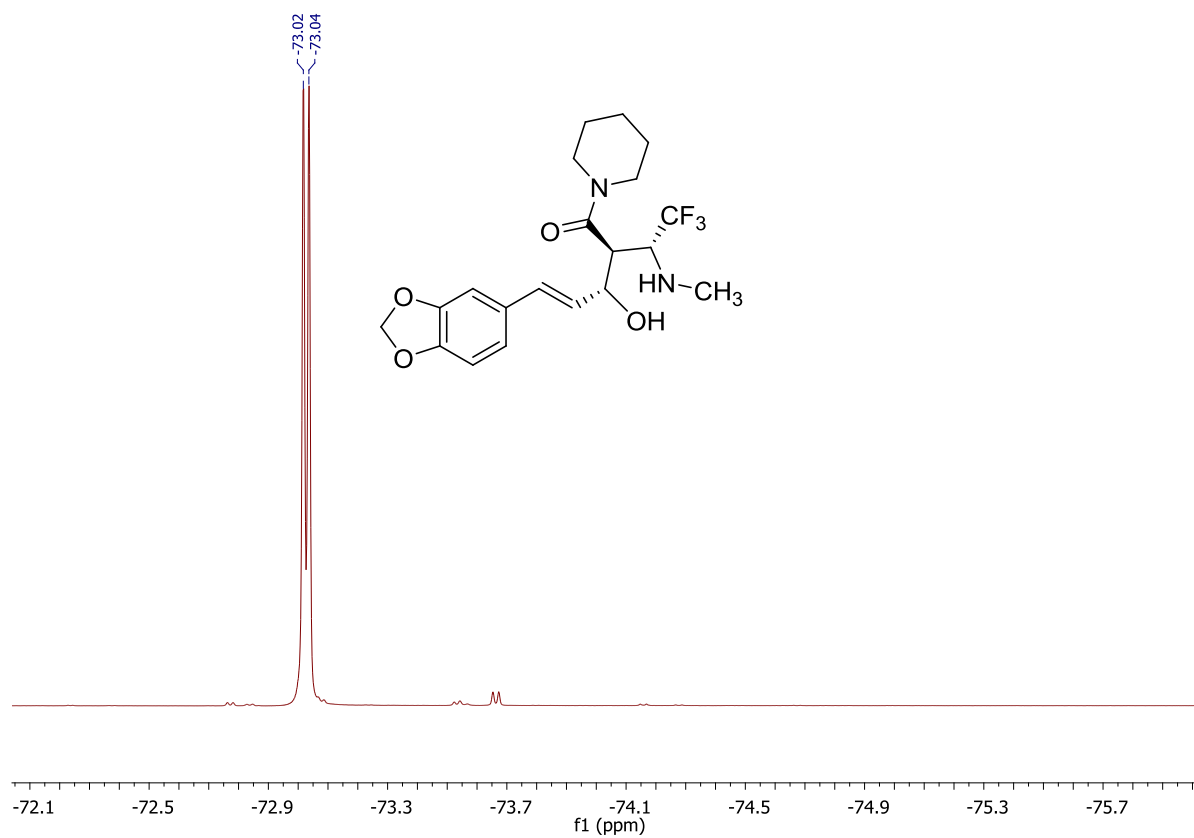

**Compound 10a,  $^{19}\text{F}$  NMR ( $\text{CDCl}_3$ )**

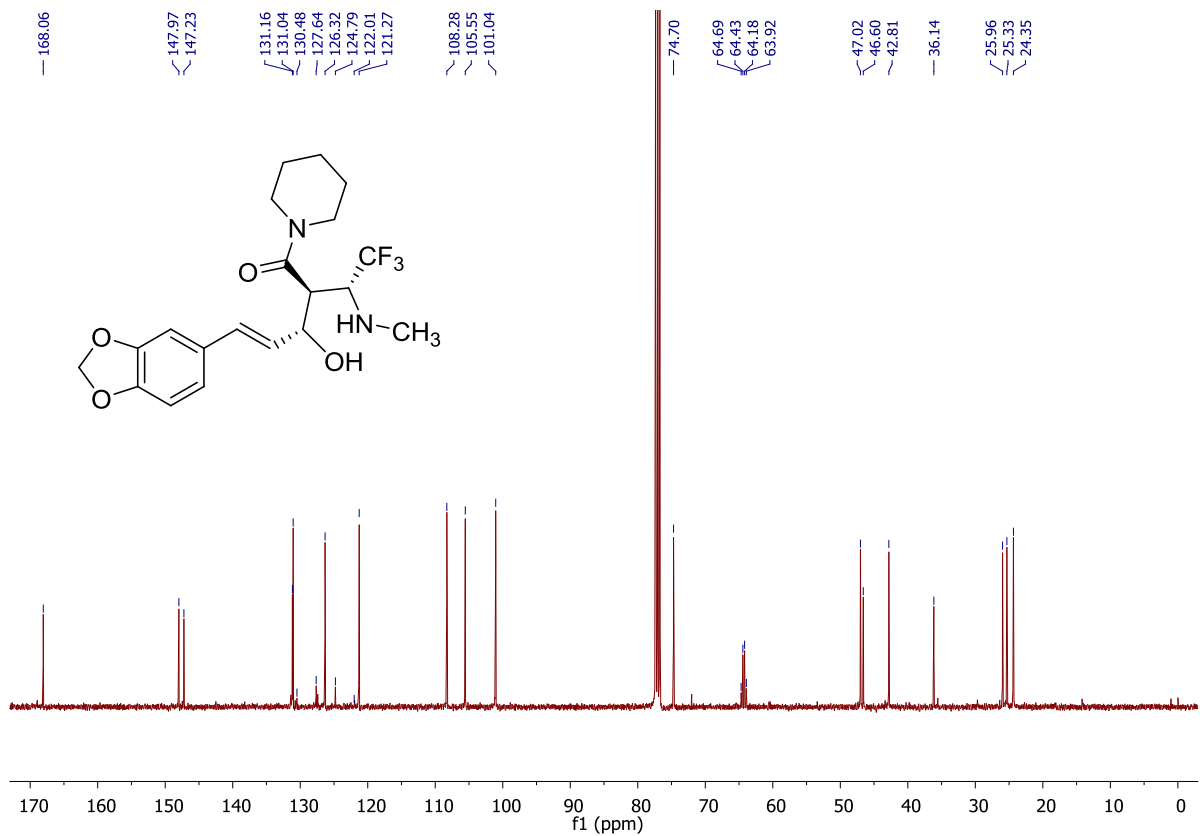

**Compound 10a,  $^{13}\text{C}$  NMR ( $\text{CDCl}_3$ )**

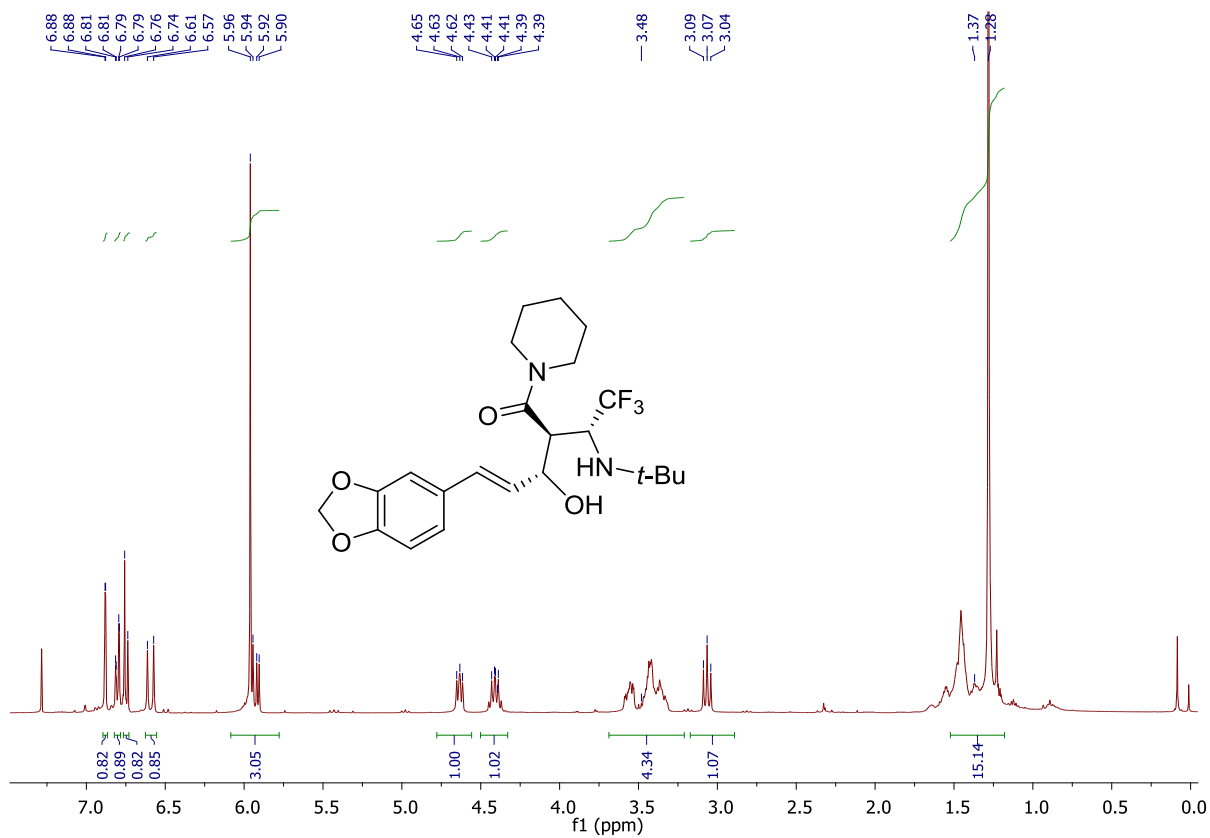

**Compound 10c,  $^1\text{H}$  NMR ( $\text{CDCl}_3$ )**

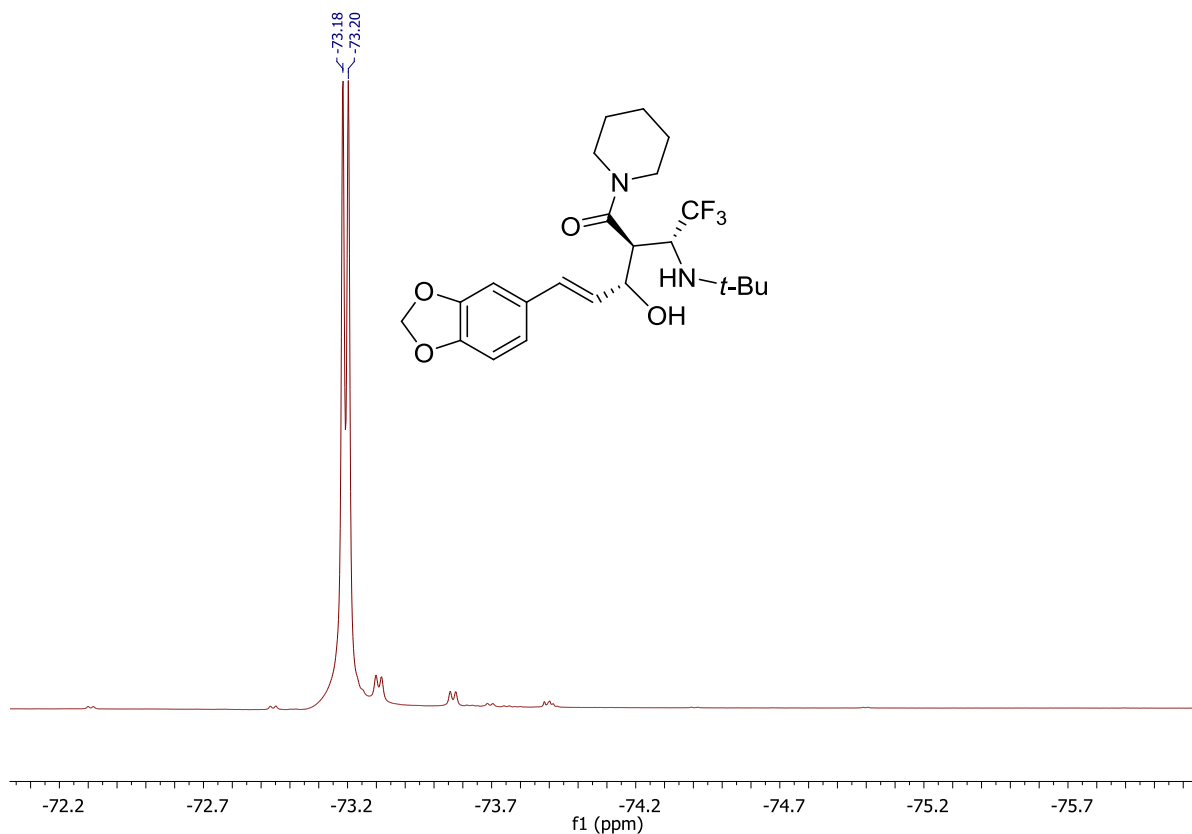

Compound 10c,  $^{19}\text{F}$  NMR (CDCl<sub>3</sub>)

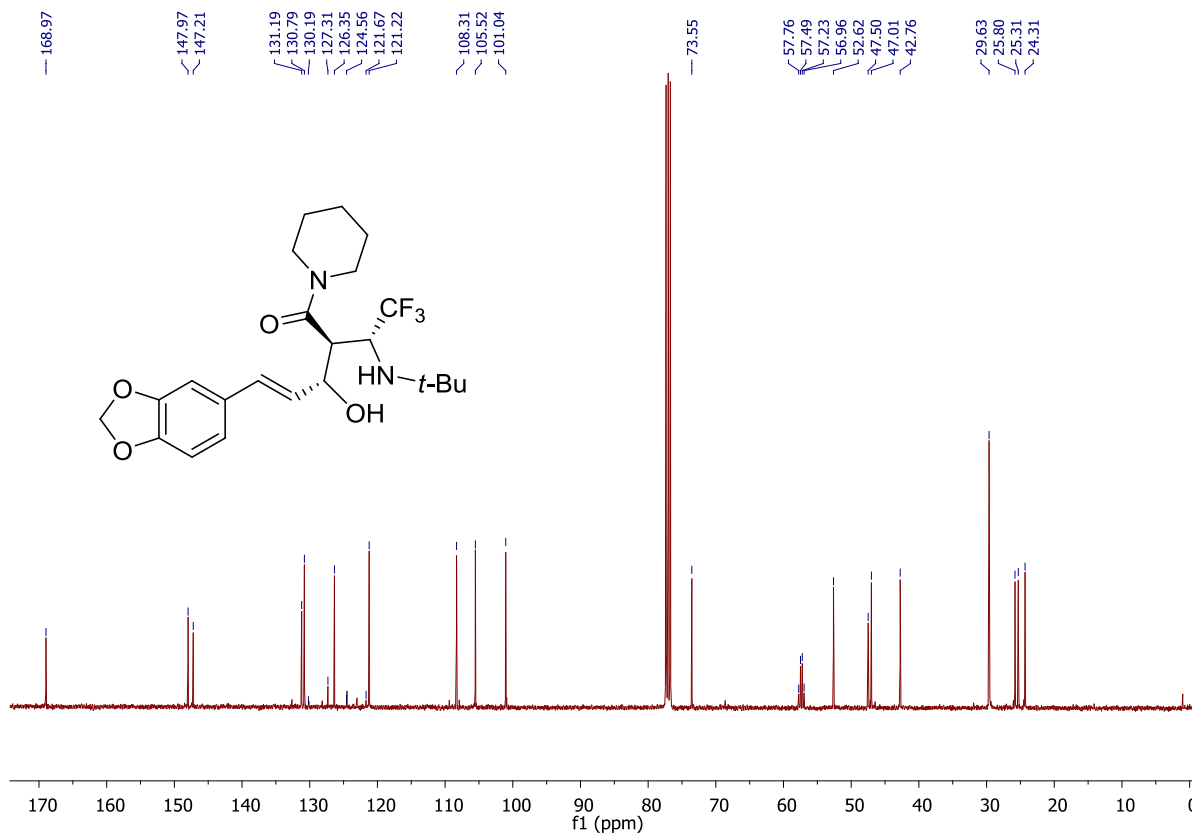

Compound 10c,  $^{13}\text{C}$  NMR (CDCl<sub>3</sub>)

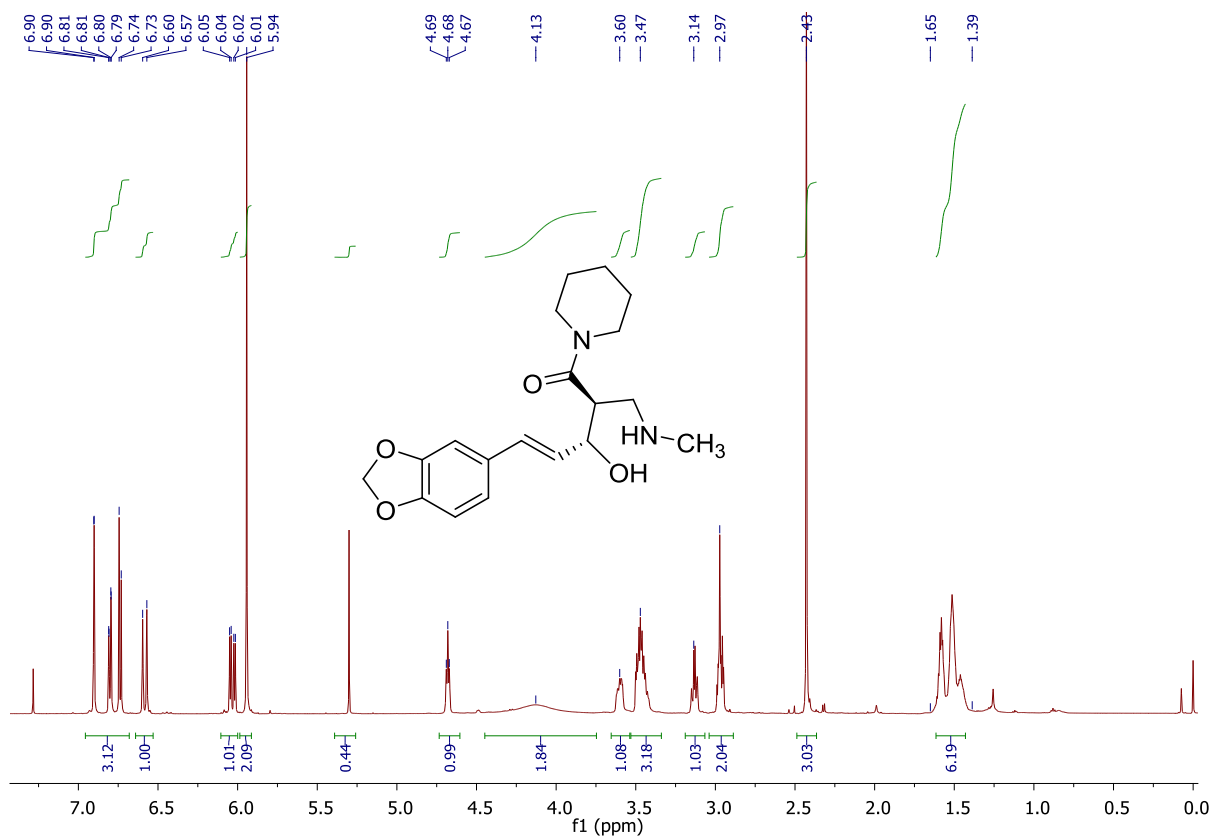

Compound 10d,  $^1\text{H}$  NMR ( $\text{CDCl}_3$ )

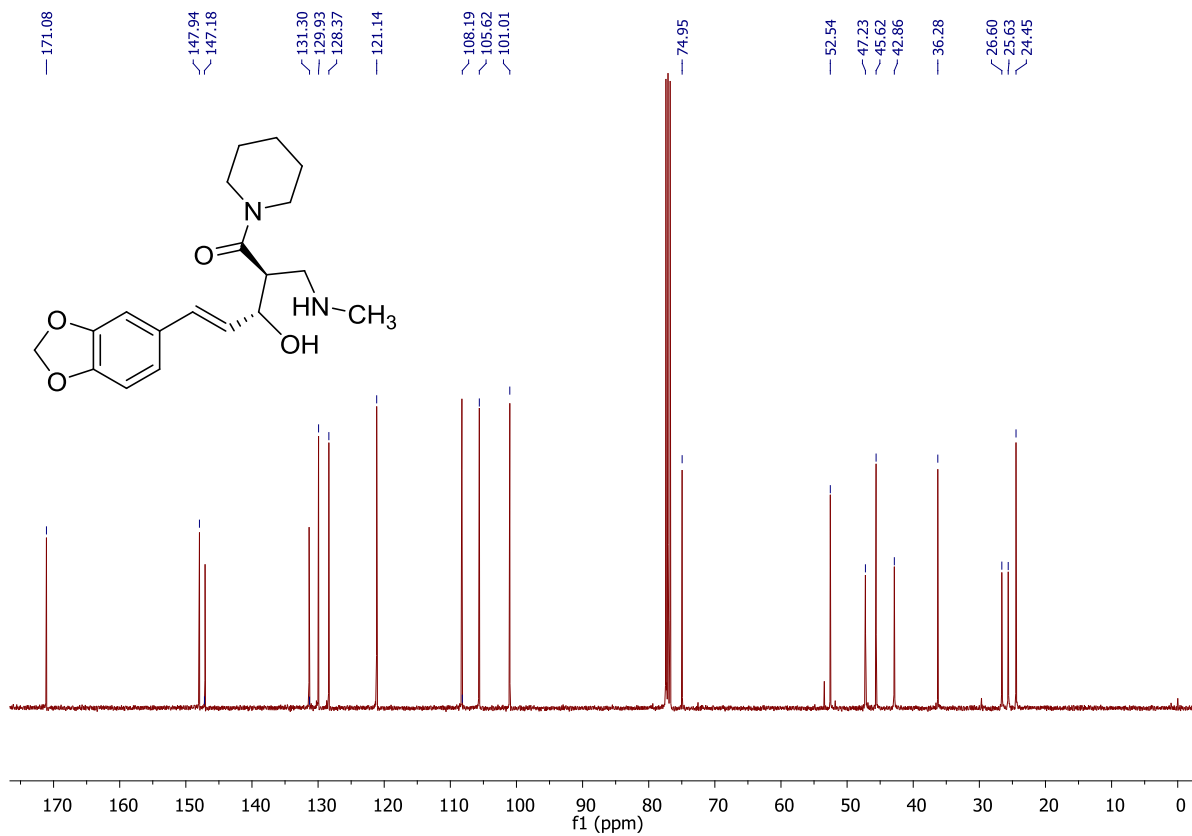

Compound 10d,  $^{13}\text{C}$  NMR ( $\text{CDCl}_3$ )

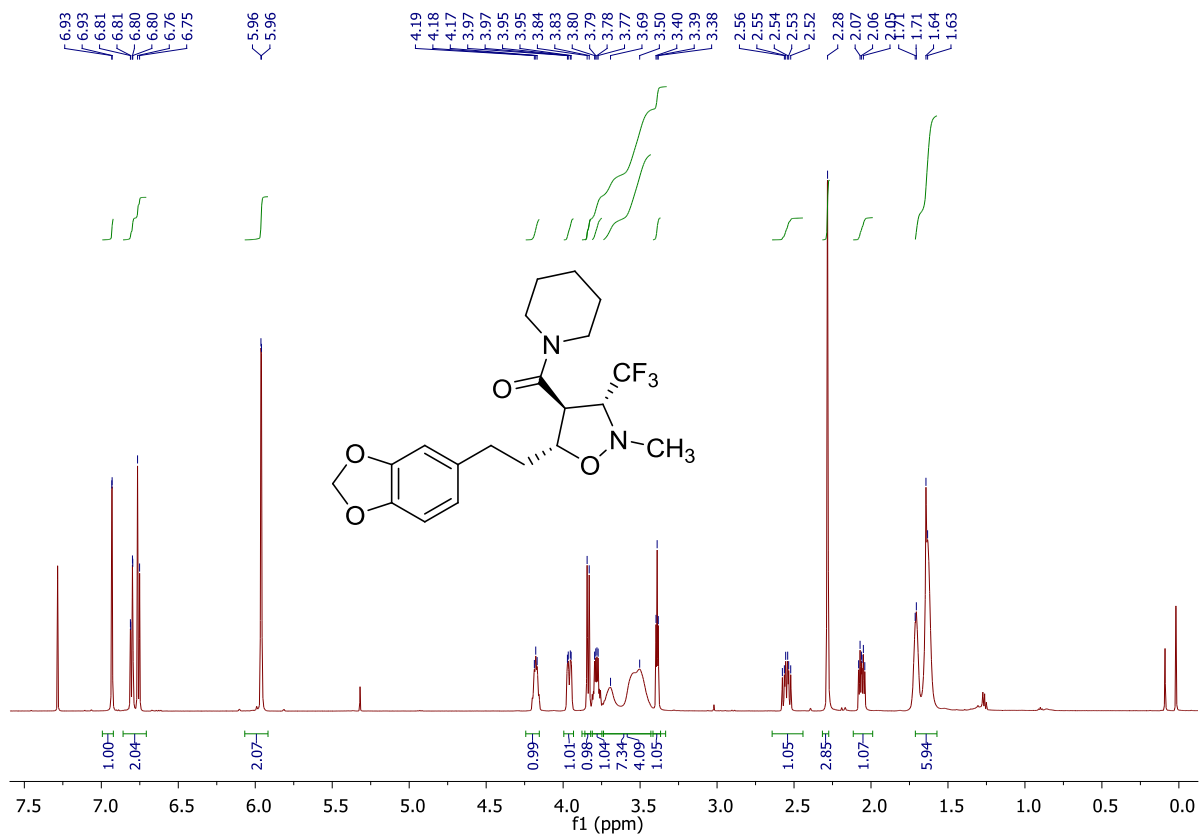

**Compound 11a,  $^1\text{H NMR}$  (CDCl<sub>3</sub>)**

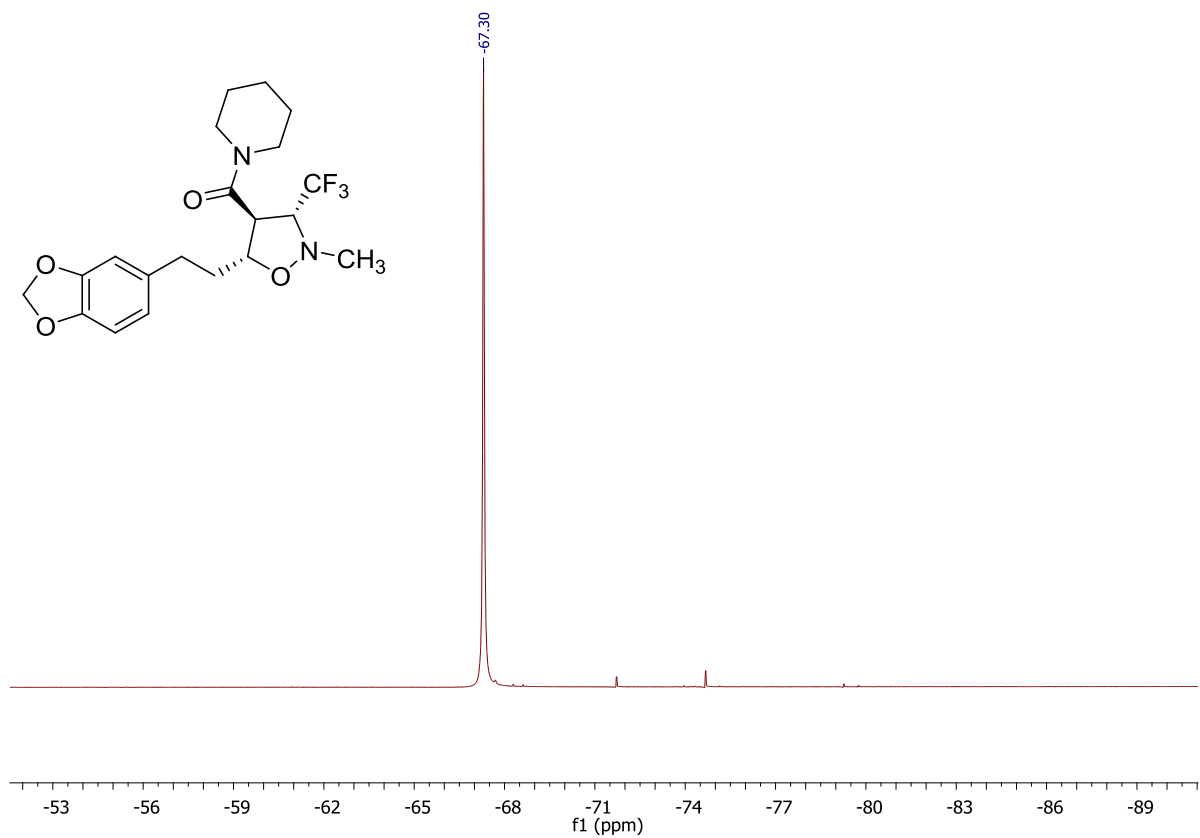

**Compound 11a,  $^{19}\text{F NMR}$  (CDCl<sub>3</sub>)**

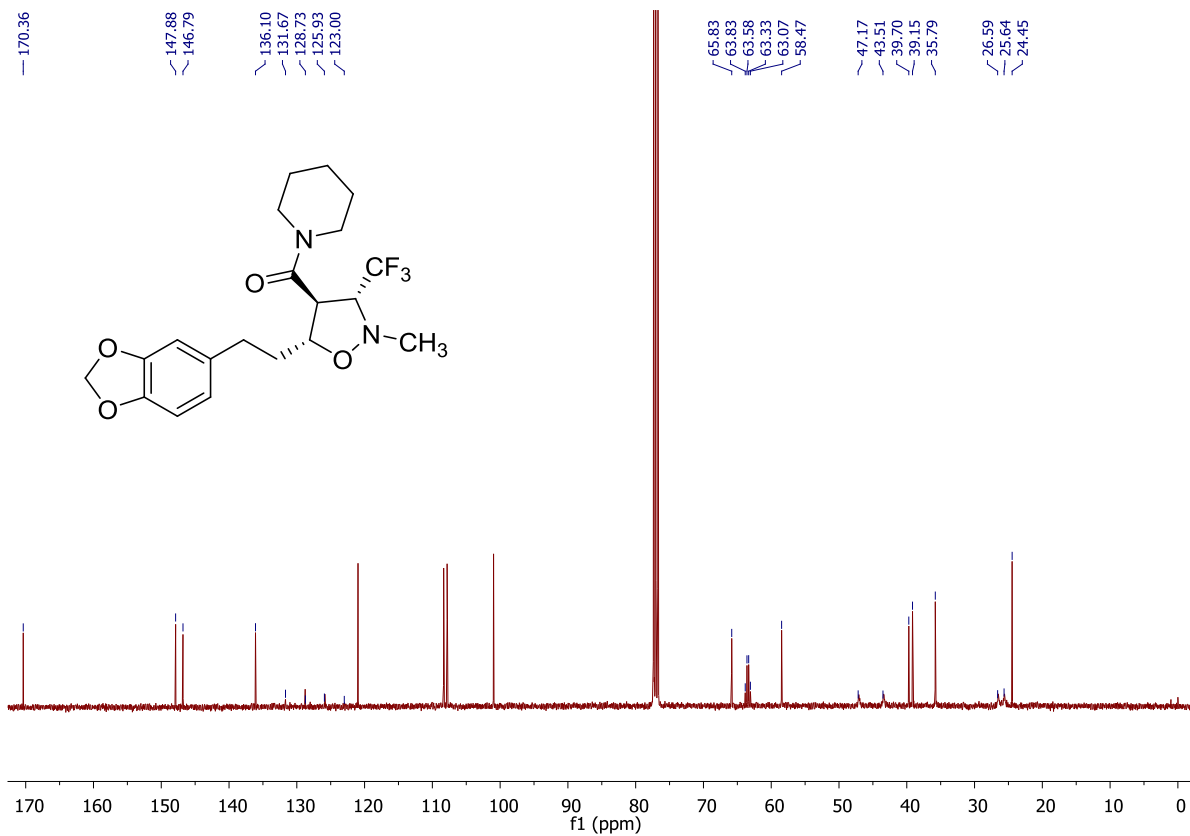

Compound 11a,  $^{13}\text{C}$  NMR (CDCl<sub>3</sub>)

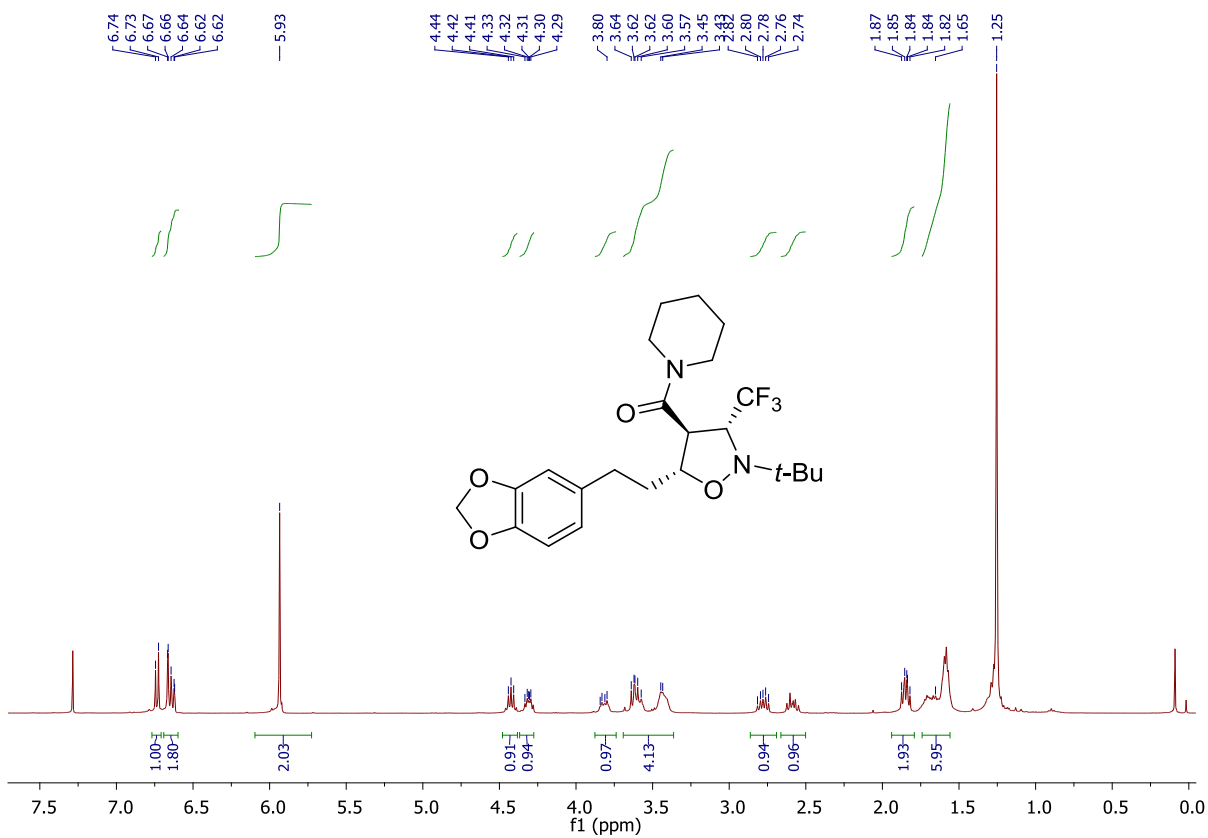

Compound 11c,  $^1\text{H}$  NMR (CDCl<sub>3</sub>)

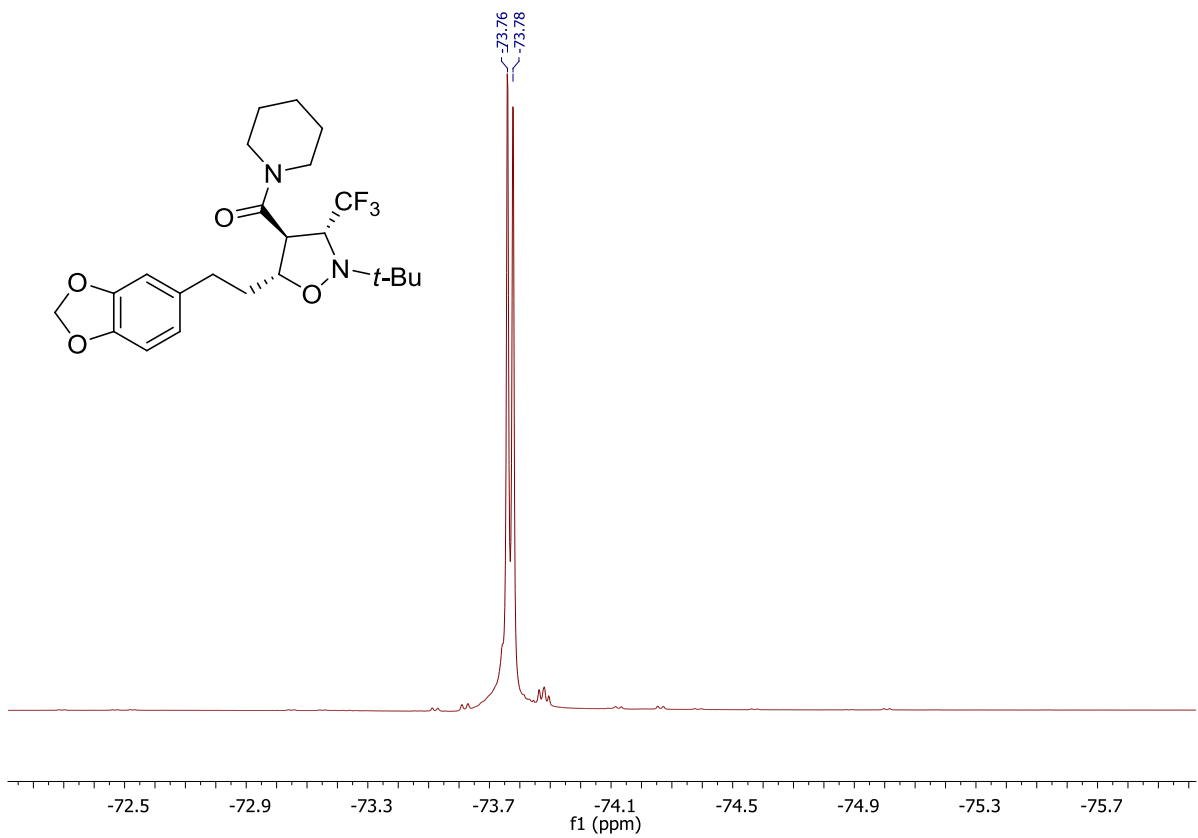

**Compound 11c,  $^{13}\text{C}$  NMR ( $\text{CDCl}_3$ )**

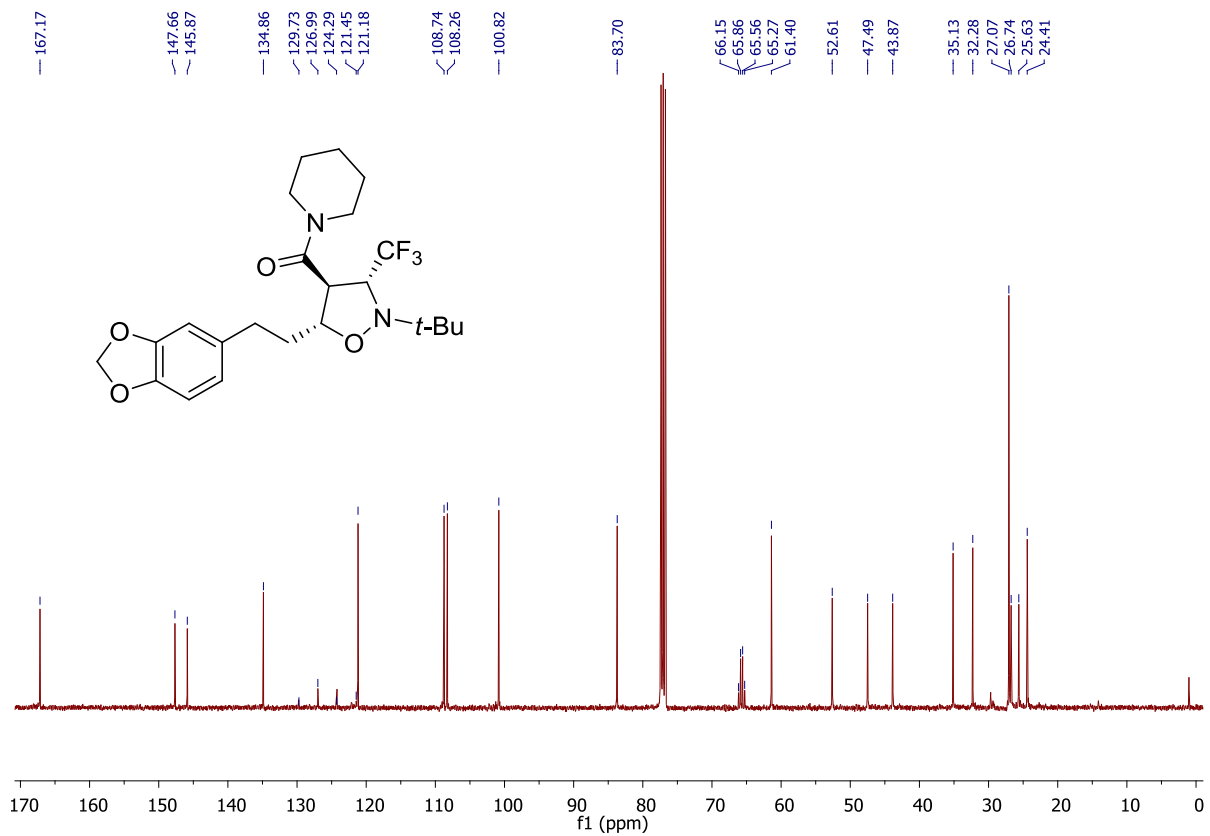

**Compound 11c,  $^{13}\text{C}$  NMR ( $\text{CDCl}_3$ )**



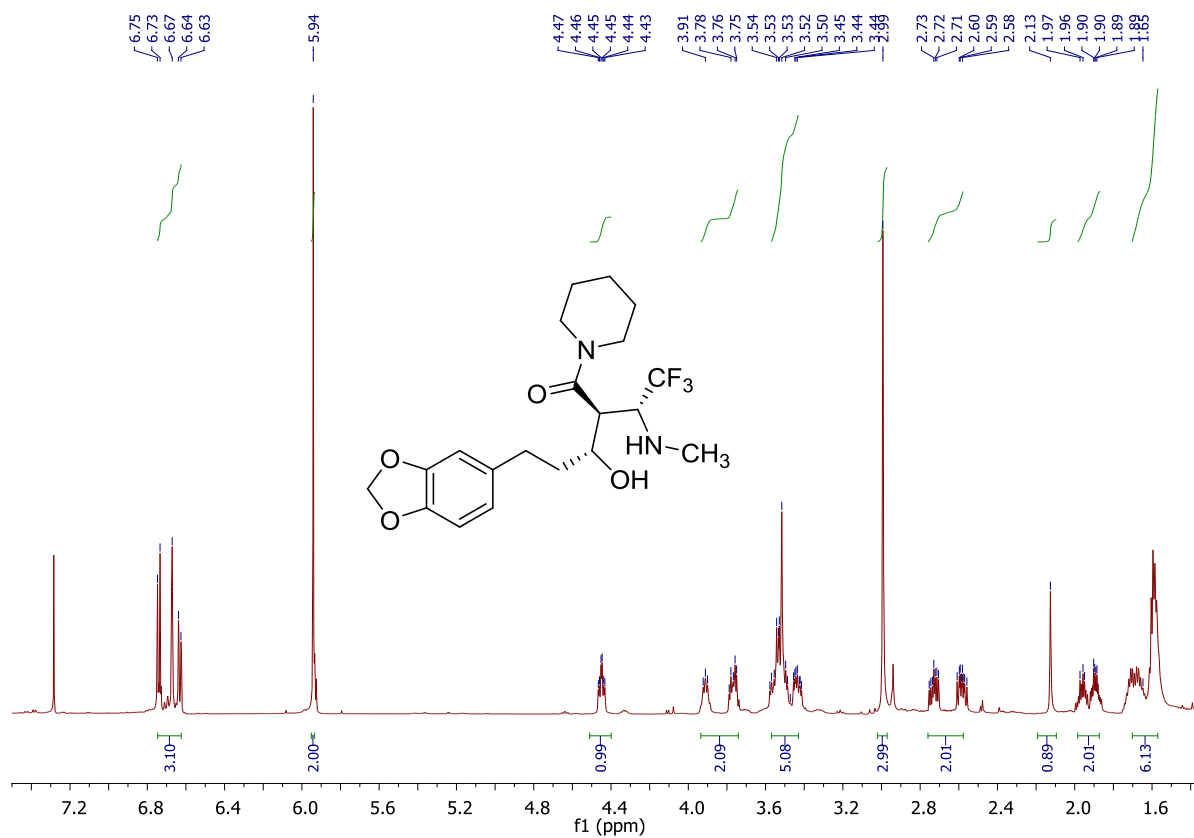

Compound 12a, <sup>1</sup>H NMR (CDCl<sub>3</sub>)

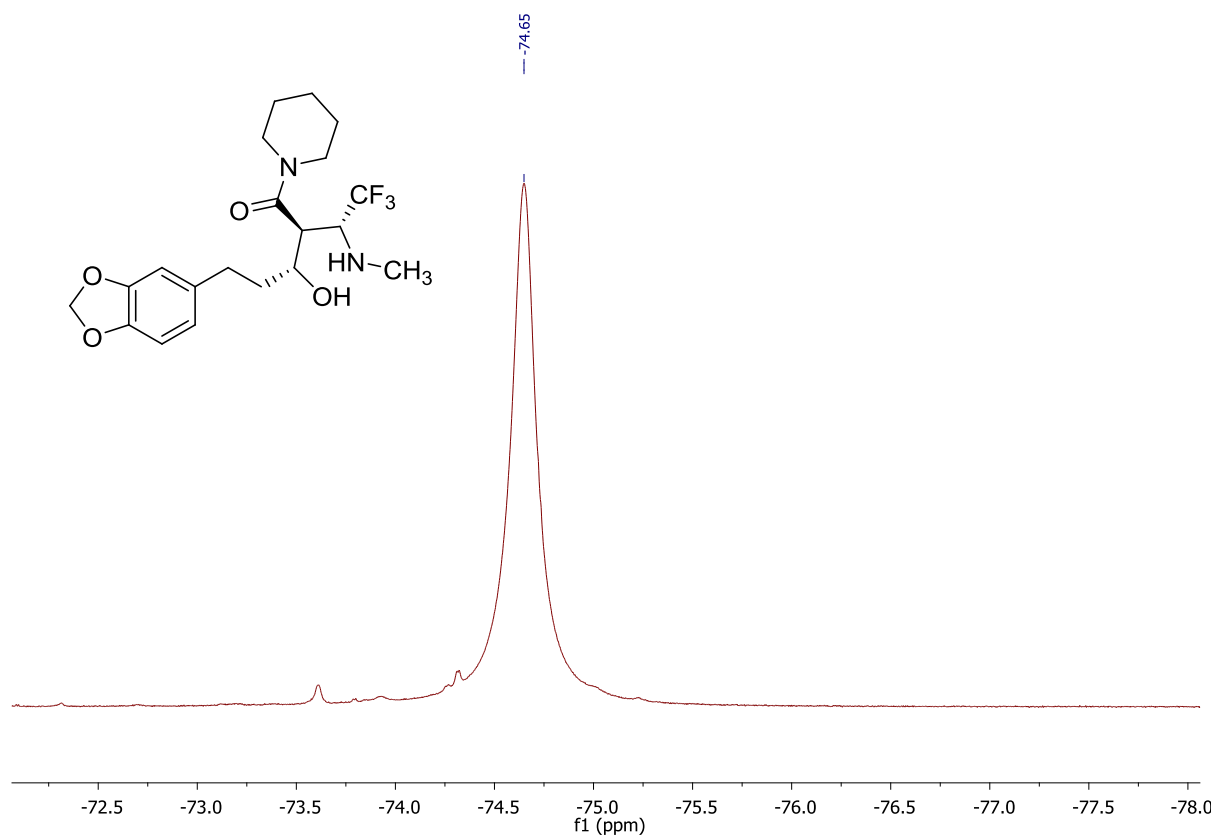

Compound 12a, <sup>19</sup>F NMR (CDCl<sub>3</sub>)

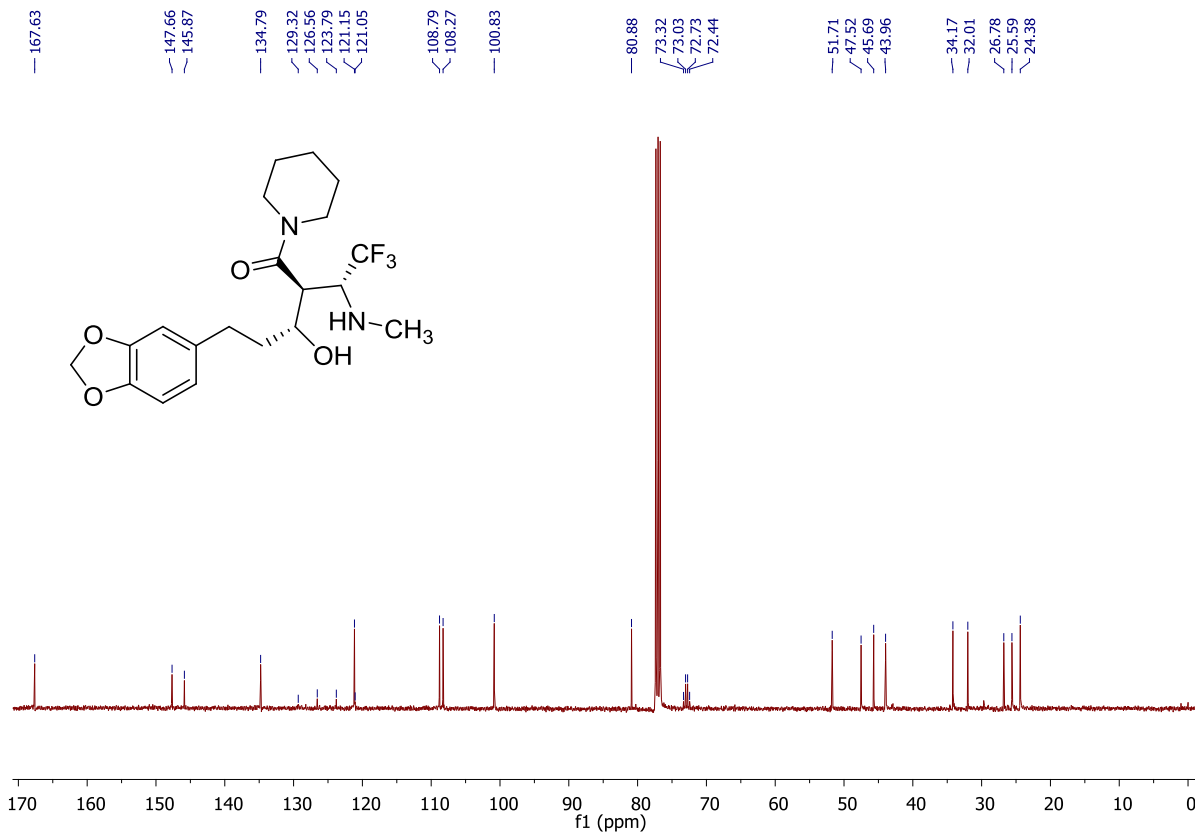

Compound 12a,  $^{13}\text{C}$  NMR ( $\text{CDCl}_3$ )

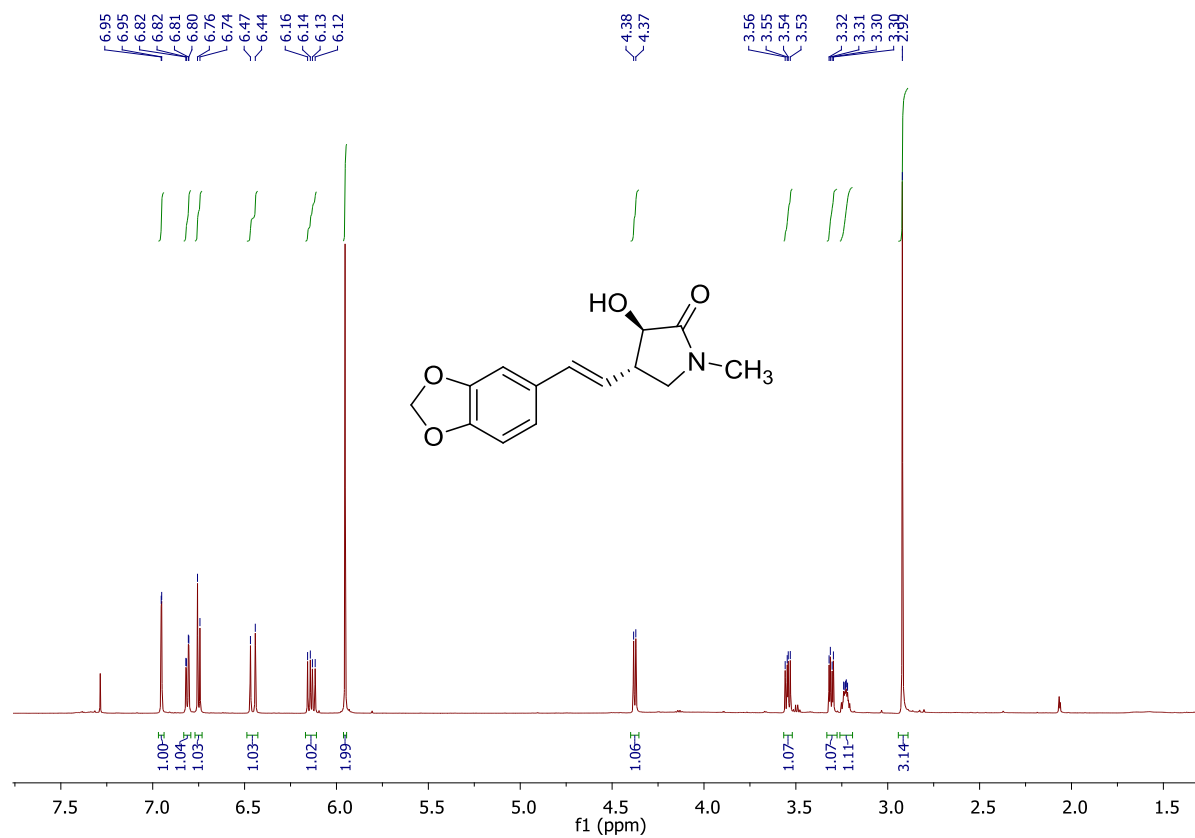

Compound 13,  $^1\text{H}$  NMR ( $\text{CDCl}_3$ )

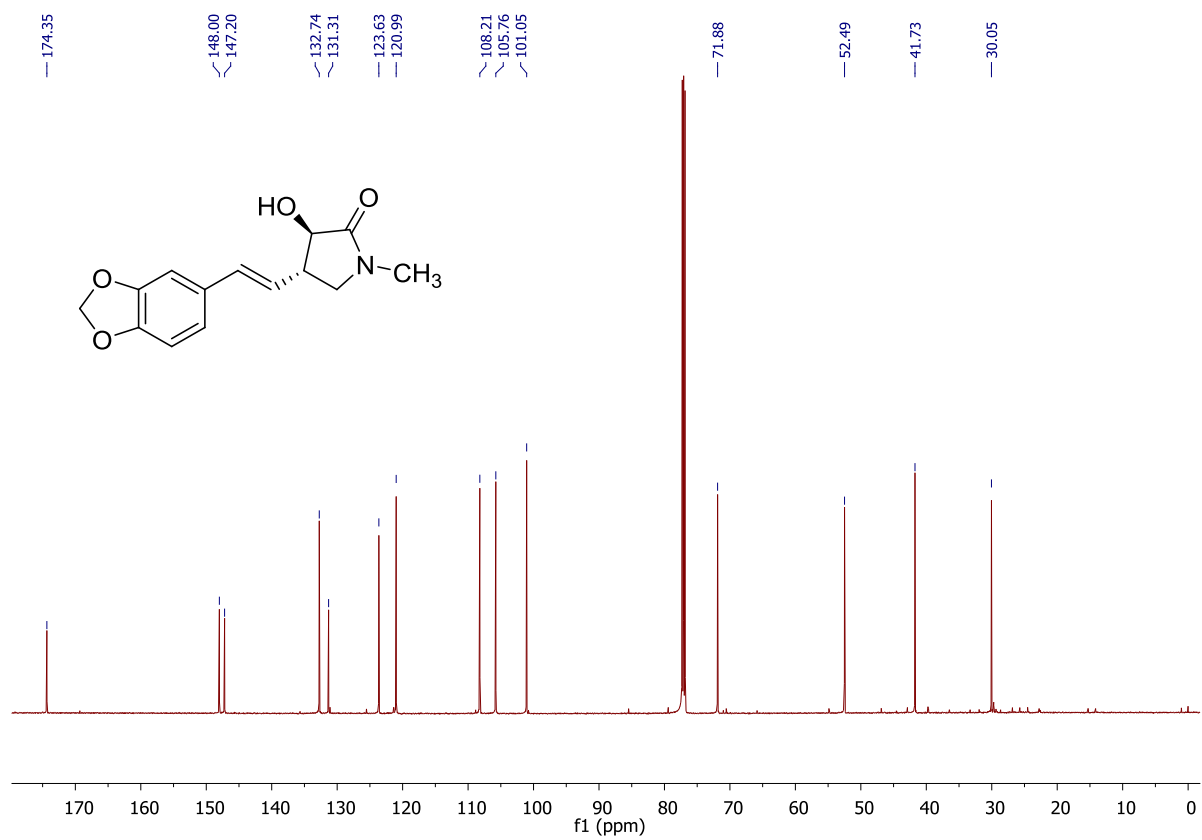

Compound 13,  $^{13}\text{C}$  NMR ( $\text{CDCl}_3$ )
